1 **Aire-dependent genes undergo Clp1-mediated 3'UTR shortening associated with higher**  
2 **transcript stability in the thymus**

3

4 Clotilde Guyon<sup>1†</sup>, Nada Jmari<sup>1†</sup>, Francine Padonou<sup>1,2</sup>, Yen-Chin Li<sup>1</sup>, Olga Ucar<sup>3</sup>, Noriyuki  
5 Fujikado<sup>4</sup>, Fanny Couplier<sup>5</sup>, Christophe Blanchet<sup>6</sup>, David E. Root<sup>7</sup> and Matthieu Giraud<sup>1,2\*</sup>

6

7 <sup>1</sup>Institut Cochin, INSERM U1016, Université Paris Descartes, Sorbonne Paris Cité, Paris, France

8 <sup>2</sup>Centre de Recherche en Transplantation et Immunologie, INSERM UMR 1064, Université de  
9 Nantes, Nantes, France

10 <sup>3</sup>Division of Developmental Immunology, German Cancer Research Center, Heidelberg,  
11 Germany

12 <sup>4</sup>Division of Immunology, Department of Microbiology and Immunobiology, Harvard Medical  
13 School, Boston, MA 02115

14 <sup>5</sup>Ecole Normale Supérieure, PSL Research University, CNRS, INSERM, Institut de Biologie de  
15 l'Ecole Normale Supérieure (IBENS), Plateforme Génomique, Paris, France

16 <sup>6</sup>Institut Français de Bioinformatique, IFB-Core, CNRS UMS 3601, Evry, France.

17 <sup>7</sup>The Broad Institute of MIT and Harvard, Cambridge, MA 02142

18 † Equal contributions

19 \* Correspondence should be addressed to Dr Matthieu Giraud: [matthieu.giraud@inserm.fr](mailto:matthieu.giraud@inserm.fr)

20

## 21 **Abstract**

22 The ability of the immune system to avoid autoimmune disease relies on tolerization of  
23 thymocytes to self-antigens whose expression and presentation by thymic medullary  
24 epithelial cells (mTECs) is controlled predominantly by Aire at the transcriptional level and  
25 possibly regulated at other unrecognized levels. Aire-sensitive gene expression is influenced  
26 by several molecular factors, some of which belong to the 3'end processing complex,  
27 suggesting they might impact transcript stability and levels through an effect on 3'UTR  
28 shortening. We discovered that Aire-sensitive genes display a pronounced preference for  
29 short-3'UTR transcript isoforms in mTECs, a feature preceding Aire's expression and  
30 correlated with the preferential selection of proximal polyA sites by the 3'end processing  
31 complex. Through an RNAi screen and generation of a lentigenic mouse, we found that one  
32 factor, Clp1, promotes 3'UTR shortening associated with higher transcript stability and  
33 expression of Aire-sensitive genes, revealing a post-transcriptional level of control of Aire-  
34 activated expression in mTECs.

35

36

## 37 Introduction

38 Immunological tolerance is a key feature of the immune system that protects against  
39 autoimmune disease by preventing immune reactions against self-constituents. Central  
40 tolerance is shaped in the thymus and relies on a unique property of a subset of medullary  
41 thymic epithelial cells (mTECs). This subset is composed of mTEChi that express high levels of  
42 MHC class II molecules and a huge diversity of self-antigens (Danan-Gotthold, Guyon, Giraud,  
43 Levanon, & Abramson, 2016; Kyewski & Klein, 2006). Thus, developing T lymphocytes in the  
44 thymus are exposed to a broad spectrum of self-antigens displayed by mTEChi. Those  
45 lymphocytes that recognize their cognate antigens undergo either negative selection, thereby  
46 preventing the escape of potentially harmful autoreactive lymphocytes out of the thymus, or  
47 differentiate into thymic regulatory T cells beneficial for limiting autoreactivity (Cowan et al.,  
48 2013; Goodnow, Sprent, Fazekas de St Groth, & Vinuesa, 2005; Klein, Kyewski, Allen, &  
49 Hogquist, 2014). Self-antigens expressed by mTEChi include a large number of tissue-  
50 restricted antigens (TRAs), so-named because they are normally restricted to one or a few  
51 peripheral tissues (Derbinski, Schulte, Kyewski, & Klein, 2001; Sansom et al., 2014). A large  
52 fraction of these TRAs in mTEChi are induced by a single transcriptional activator that is  
53 expressed almost exclusively in these cells - the autoimmune regulator Aire. Mice deficient  
54 for the *Aire* gene exhibit impaired TRA expression in mTEChi, whereas TRA expression remains  
55 normal in peripheral tissues of these mice. Consistent with inadequate development of  
56 central tolerance, *Aire* knockout (KO) mice develop autoantibodies directed at some of these  
57 TRAs, resulting in immune infiltrates in multiple tissues (Anderson, 2002). Correspondingly,  
58 loss-of-function mutations in the human *AIRE* gene result in a multi-organ autoimmune  
59 disorder known as autoimmune polyglandular syndrome type 1 (Nagamine et al., 1997;  
60 Peterson, Pitkänen, SILLANPAA, & Krohn, 2004).

61           How the expression of thousands of Aire-sensitive self-antigen genes is controlled in  
62 mTEChi has been a subject of extensive investigation. Significant progress has been made,  
63 notably through the identification of a number of molecular factors that further activate the  
64 expression of prototypic Aire-sensitive genes in a model employing cell lines that express Aire  
65 ectopically by transfection with a constitutive *Aire* expression vector (Abramson, Giraud,  
66 Benoist, & Mathis, 2010; Giraud et al., 2014). These studies revealed a role for relaxation of  
67 chromatin in front of the elongating RNA polymerase (RNAP) II by the PRKDC-PARP1-SUPT16H  
68 complex (Abramson et al., 2010) and for an HNRNPL-associated release of the stalled RNAPII  
69 (Giraud et al., 2014). However, the effect of most of the identified factors on the full set of  
70 Aire-sensitive genes in mTEChi is unknown. It remains also uncertain whether these factors  
71 partake in a molecular mechanism directly orchestrated by Aire or in a basal transcriptional  
72 machinery that would control the expression of Aire-sensitive genes even before Aire is  
73 expressed in mTEChi. Lack of knowledge of the precise *modus operandi* of the identified  
74 factors potentially leaves major aspects of promiscuous mTEChi gene expression unknown.

75           Among the identified factors, seven of them, namely CLP1, DDX5, DDX17, PABPC1,  
76 PRKDC, SUPT16H and PARP1, have been reported to belong to the large multi-subunit 3' end  
77 processing complex (de Vries et al., 2000; Shi et al., 2009) which controls pre-mRNA cleavage  
78 and polyadenylation at polyA sites (pAs) (Colgan & Manley, 1997). Hence, we asked whether  
79 any of these identified factors could influence Aire-sensitive gene expression partially or  
80 entirely by the way of an effect on pre-mRNA 3' end maturation. Deep sequencing approaches  
81 have revealed that the vast majority of protein-coding genes in mammal genomes (70 - 79%)  
82 have multiple pAs mostly located in 3'UTRs (Derti et al., 2012; Hoque et al., 2013). These  
83 genes are subject to differential pA usage through alternative cleavage and polyadenylation  
84 directed by the 3' end processing complex and are transcribed as isoforms with longer or

85 shorter 3'UTRs depending on the pA usage (Tian & Manley, 2013). The 3' end processing  
86 complex is composed of a core effector sub-complex comprising CLP1 (de Vries et al., 2000;  
87 Mandel, Bai, & Tong, 2008) and a number of accessory proteins that include DDX5, DDX17,  
88 PABPC1, PRKDC, SUPT16H and PARP1 (Shi et al., 2009). Although the individual roles of  
89 accessory proteins on differential pA usage remain largely unknown, the core protein Clp1  
90 has been reported to favor proximal pA selection in yeast based on depletion experiments  
91 (Holbein et al., 2011). Similarly, increasing levels of Clp1 bound to the 3' end processing  
92 complex was also shown to favor proximal pA selection and shorter 3'UTR isoforms (Johnson,  
93 Kim, Erickson, & Bentley, 2011). In contrast, a preference for distal pA selection was reported  
94 for higher Clp1 levels in a mouse myoblast cell line based on siRNA Clp1 loss-of-function  
95 experiments (Li et al., 2015).

96         Given the observations from prior work that many of the genes, other than Aire itself,  
97 that modulate the expression of Aire-induced genes, are members of the 3' end processing  
98 complex, and that one such member of this complex, Clp1, has been reported to affect pA  
99 selection, we speculated that 3'UTR length and regulation might be involved in expression of  
100 TRAs in mTEChi. We therefore set out to investigate relationships between Aire sensitivity, 3'  
101 end processing, and pA selection in mTEChi.

102

103

## 104 **Results**

### 105 **Aire-sensitive genes show a preference for short-3'UTR transcript isoforms in mTEChi and** 106 **in some peripheral tissues**

107 To assess the proportion of long and short-3'UTR transcript isoforms in mTEChi, we selected  
108 the genes that harbor potential proximal alternative pAs in their annotated 3'UTRs according

109 to the PolyA\_DB 2 database which reports pAs identified from comparisons of cDNAs and  
110 ESTs from a very large panel of peripheral tissues (Lee, Yeh, Park, & Tian, 2007). For each  
111 gene, the relative expression of the long 3'UTR isoform versus all isoforms could be defined  
112 as the distal 3'UTR (d3'UTR) ratio, i.e., the expression of the region downstream of the  
113 proximal pA (d3'UTR) normalized to the upstream region in the last exon (**Figure 1A** and  
114 **Figure 1–source data 1**). To determine whether the Aire-sensitive genes exhibit a biased  
115 proportion of long and short-3'UTR isoforms in mTEChi, we first performed RNA deep-  
116 sequencing (RNA-seq) of mTEChi sorted from WT and *Aire*-KO mice in order to identify the  
117 Aire-sensitive genes, i.e., those upregulated by Aire (**Figure 1B**). We then compared the  
118 distribution of d3'UTR ratios in Aire-sensitive versus Aire-neutral genes. We found a  
119 significant shift towards smaller ratios, revealing a preference of Aire-sensitive genes for  
120 short-3'UTR isoforms in mTEChi (**Figure 1C**, **Figure 1–figure supplement 1A** and **Figure 1–**  
121 **source data 2**). Since a much larger proportion of Aire-sensitive genes than Aire-neutral genes  
122 are known to be TRA genes, we asked whether the preference of genes for short-3'UTRs was  
123 more aligned with Aire-sensitivity or being a TRA gene. To this end, we compared the d3'UTR  
124 ratios between the TRA and non-TRA genes as defined in reference (Sansom et al., 2014) in  
125 the subsets of Aire-sensitive and neutral genes. In these mTEChi, the short-3'UTR isoform  
126 preference was observed preferentially in Aire-sensitive genes regardless of whether or not  
127 they were TRA genes (**Figure 1D**).

128 To discriminate whether the preference for short-3'UTR isoforms in the Aire-sensitive  
129 genes was directly associated with the process of Aire's induction of gene expression or rather  
130 was a feature of Aire-sensitive genes preserved in the absence of Aire, we analyzed the  
131 proportion of long 3'UTR isoforms for the Aire-sensitive genes in *Aire*-KO mTEChi. We note  
132 that by definition these genes are all expressed at lower levels in the absence of Aire but that

133 most are still expressed at levels sufficient to determine 3'UTR isoform ratios. We observed a  
134 preference for the smaller ratios (**Figure 1E**, **Figure 1–figure supplement 1B** and **Figure 1–**  
135 **source data 2**) in Aire-sensitive versus neutral genes in the *Aire*-KO cells. We further noted  
136 that the majority (~90%) of Aire-sensitive genes with small d3'UTR ratios (<0.25) in WT  
137 mTEChi were also characterized by small d3'UTR ratios in *Aire*-KO mTEChi (**Figure 1F** and  
138 **Figure 1–figure supplement 1C**). Together, these observations showed that the short-3'UTR  
139 isoform preference of Aire-sensitive genes in mTEChi was specific to those genes responsive  
140 to Aire, whether or not Aire was actually present.

141 To determine if genes sensitive to Aire exhibit a preference for short-3'UTR isoforms  
142 in their normal tissue of expression, we collected RNA-seq datasets corresponding to a variety  
143 of tissues (Shen et al., 2012; van den Berghe et al., 2013; Warren et al., 2013), selected the  
144 Aire-sensitive genes characterized by a tissue-restricted expression as identified by the SPM  
145 (Specificity Measurement) method (Pan et al., 2013) (**Figure 1–figure supplement 1D,E**), the  
146 Aire-neutral-genes, and compared the proportion of their 3'UTR isoforms in the individual  
147 tissues. We found variable preference for short-3'UTR isoforms across peripheral tissues,  
148 ranging from none to high, with the mTEChi result falling in the high end of this range (**Figure**  
149 **1G** and **Figure 1–figure supplement 1F**). This finding suggests that factors underlying the  
150 preference of Aire-sensitive genes for short-3'UTR isoforms are not necessarily restricted to  
151 mTEChi.

152

### 153 **The 3' end processing complex is preferentially located at proximal pAs of Aire-sensitive** 154 **genes in AIRE-negative HEK293 cells**

155 We sought to determine whether the preference for short-3'UTR isoforms of Aire-sensitive  
156 genes observed in *Aire*-KO mTEChi and conserved upon upregulation by Aire, is associated

157 with a preferred proximal pA usage driven by the 3' end processing complex. Current  
158 techniques dedicated to localize RNA-binding proteins on pre-mRNAs, e.g., ultraviolet  
159 crosslinking and immunoprecipitation (CLIP)-seq (König, Zarnack, Luscombe, & Ule, 2012),  
160 need several millions of cells, precluding their use with primary *Aire*-KO or WT mTEChi for  
161 which only ~30,000 cells can be isolated per mouse. To circumvent this issue and since we  
162 showed (above) that the preference for short-3'UTR isoforms of Aire-sensitive genes was not  
163 exclusive to mTEChi, we used the HEK293 cell line. HEK293 cells are (i) negative for AIRE  
164 expression, (ii) responsive to the transactivation activity of transfected Aire (Abramson et al.,  
165 2010; Giraud et al., 2012), and (iii) have been profiled for the RNA binding of the 3' end  
166 processing components by Martin et al. by PAR-CLIP experiments (Martin, Gruber, Keller, &  
167 Zavolan, 2012). Similarly to what we found in WT and *Aire*-KO mTEChi, we observed in *Aire*-  
168 transfected and Ctr-transfected HEK293 cells significant lower d3'UTR ratios for genes  
169 identified by *Aire* transfection to be Aire-sensitive versus Aire-neutral genes (**Figure 2A** and  
170 **Figure 2–figure supplement 1A**). It should be noted that many Aire-neutral genes featured  
171 moderately lower d3'UTR ratios in *Aire*-transfected HEK293 cells than Ctr-transfected cells,  
172 as a possible effect of Aire itself on an overall 3'UTR shortening in these cells, but this did not  
173 produce the large proportion of very small d3'UTR ratios (<0.2) that were exhibited by the  
174 Aire-sensitive genes in *Aire* or Ctr-transfected HEK293 cells. Within HEK293 cells, localization  
175 of the 3'end processing complex at proximal or distal pAs was performed by analyzing the  
176 binding pattern of CSTF2, the member of the core 3' end processing complex that has been  
177 reported to exhibit the highest binding affinity for the maturing transcripts at their cleavage  
178 sites close to pAs (Martin et al., 2012). We first validated for Aire-neutral genes that lower  
179 d3'UTR ratios correlated with the preferential location of the 3' end processing complex at  
180 proximal pAs (**Figure 2–figure supplement 1B**). Then we compared the location of the



181 complex between the Aire-sensitive and neutral genes, and found a dramatic preference for  
182 proximal pAs versus distal pAs at Aire-sensitive genes (**Figure 2B**), showing that the 3' end  
183 processing complex was already in place at proximal pAs of Aire-sensitive genes before Aire  
184 expression was enforced in HEK293 cells.

185

186 **CLP1 promotes 3'UTR shortening and higher expression at Aire-sensitive genes in HEK293**  
187 **cells**

188 Since the preference for short-3'UTR isoform expression of Aire-sensitive genes is associated  
189 with the increased binding of the 3' end processing complex to proximal pAs in AIRE-negative  
190 HEK293 cells, we asked whether factors that belong to the large 3' end processing complex  
191 (de Vries et al., 2000; Shi et al., 2009) could account for the short-3'UTR transcript isoform  
192 preference of Aire-sensitive genes in these cells and affect the expression of these genes.  
193 Among the members of the core and accessory subunits of the 3' end processing complex,  
194 the cleavage factor CLP1 (core) and also DDX5, DDX17, PABPC1, PRKDC, SUPT16H and PARP1  
195 (accessory) have been reported to control Aire-sensitive gene expression in an Aire-positive  
196 context (Giraud et al., 2014) with the possibility that the effect of some of these factors could  
197 result from their action on the basal expression of Aire-sensitive genes and therefore be  
198 observed in the absence of Aire. In addition to these candidate factors, we also tested the  
199 effect of HNRNPL, which although not part of the 3' end processing complex, has been shown  
200 to regulate 3' end processing of some human pre-mRNAs (Millevoi & Vagner, 2010) and  
201 control Aire transactivation function in mTEChi (Giraud et al., 2014).

202 First, to determine whether any of the candidate factors could be involved in 3'UTR  
203 shortening per se, we carried out short hairpin (sh)RNA-mediated interference in AIRE-  
204 negative HEK293 cells and generated expression profiles using Affymetrix HuGene ST1.0

205 microarrays. These arrays typically include one or two short probes per exon, and for  
206 approximately 35% of all genes with potential proximal pAs they also include at least two  
207 short probes in the d3'UTR region. In spite of the limited d3'UTR coverage and lower accuracy  
208 of hybridization measurements based on two short probes only, we found these arrays  
209 adequate to detect 3'UTR length variation at the genome-scale level. For each gene with a  
210 microarray-detectable d3'UTR region, the d3'UTR isoform ratio was calculated by dividing the  
211 measured d3'UTR expression by the whole-transcript expression based on all short probes  
212 mapping to the transcript. Comparison of the percentages of genes exhibiting a significant  
213 increase or decrease of the d3'UTR ratios upon knockdown of a candidate gene versus the  
214 control LacZ gene, was used to evaluate the specific impact of the candidate on 3'UTR isoform  
215 expression. For each candidate gene, we measured the knockdown efficiency of, typically, 5  
216 different shRNAs and selected the 3 most effective (**Supplementary File 1**). With a threshold  
217 of at least 2 shRNAs per gene producing a significant excess of genes with increased d3'UTR  
218 ratios, we found that CLP1, DDX5, DDX17, PARP1 and HNRNPL contributed to 3'UTR  
219 shortening in HEK293 cells (**Figure 3A** and **Figure 3–figure supplement 1**). As a control, we  
220 also performed knockdown of CPSF6, a core member of the 3' end processing complex, that  
221 has been consistently reported to promote general 3'UTR lengthening (Li et al., 2015; Martin  
222 et al., 2012). As expected, knockdown of *CPSF6* revealed a skewed distribution towards  
223 decreased d3'UTR ratios (**Figure 3–figure supplement 2**).

224         Then, we sought among the candidate factors that had an effect on 3'UTR shortening,  
225 those that also selectively impacted the basal (in absence of Aire) expression of the Aire-  
226 sensitive genes possessing proximal pAs by analyzing microarray whole-transcript expression  
227 in control (Ctr) and knockdown HEK293 cells. For each candidate factor, we computed the  
228 rank of differential expression of all genes in Ctr versus HEK293 cells knockdown for the tested

229 candidate, and found that *CLP1* was the only gene whose knockdown by two distinct shRNAs  
230 led to a significant reduction of the expression of Aire-sensitive genes (**Figure 3B**), focusing  
231 our subsequent study on *CLP1*. The effect of *CLP1* knockdown on Aire-sensitive genes lacking  
232 annotated proximal pAs was much less than for the genes with proximal pAs, but a smaller  
233 effect on the annotated single-pA genes was observed for one of two *CLP1* shRNAs (**Figure**  
234 **3C**). This might simply be because some genes tagged as “proximal pA-” in the incomplete  
235 PolyA\_DB 2 database possessed undiscovered proximal pAs in mTEChi and were therefore  
236 responsive to the action of *CLP1*. Our findings regarding the differential response of pA+ and  
237 pA- genes to *CLP1* loss-of-function suggested that the effect of *CLP1* on Aire-sensitive gene  
238 expression in HEK293 cells was dependent on the potential of Aire-sensitive genes to switch  
239 from using a distal to a proximal pA site.

240 To assess the effect of *CLP1* on 3'UTR shortening at Aire-sensitive genes, we  
241 performed RNA-seq experiments in Ctr and *CLP1* knockdown HEK293 cells. Comparison of the  
242 3' end profiles revealed a statistically significant increase of the median d3'UTR ratios of Aire-  
243 sensitive genes for both *CLP1* hit shRNAs (**Figure 3D, Left**), showing that *CLP1* is able to  
244 promote 3'UTR shortening at Aire-sensitive genes in HEK293 cells. The d3'UTR ratios of Aire-  
245 sensitive genes after *CLP1* knockdown did not reach those of Aire-neutral genes which could  
246 simply be due to remaining *CLP1* in these cells following knockdown (measured knockdown  
247 as 75% and 72% for shRNA 2 and 3, respectively) or could indicate that additional non-*CLP1*-  
248 dependent factors also contribute to the difference in d3'UTR ratios of Aire-sensitive versus  
249 Aire-neutral genes. In contrast to Aire-sensitive genes, no significant shift in the d3'UTR ratios  
250 of Aire-neutral genes could be detected in Ctr versus *CLP1* knockdown HEK293 cells,  
251 consistent with the microarray results (**Figure 3A**) indicating that only a small proportion of  
252 all genes in the genome with microarray-detectable d3'UTR regions underwent 3'UTR length

253 variation after *CLP1* knockdown. Finally, using RNA-seq data, we confirmed the effect of *CLP1*  
254 knockdown on the selective reduction of the expression of Aire-sensitive genes that were  
255 annotated to have alternative proximal pAs in HEK293 cells (**Figure 3D, Right**).

256 Together these findings showed that CLP1 is able to promote 3'UTR shortening and  
257 increase expression of Aire-sensitive genes with proximal pAs, supporting a linked mechanism  
258 between CLP1-promoted 3'UTR shortening and gene expression enhancement at Aire-  
259 sensitive genes.

260

### 261 **Clp1 promotes 3'UTR shortening and higher levels of Aire-upregulated transcripts in mTEChi**

262 To test for the *in vivo* impact of Clp1 on 3'UTR length variation of the transcripts upregulated  
263 by Aire in mTEChi, we generated lentigenic *Clp1* knockdown mice. Three shRNAs targeting the  
264 murine *Clp1* with the highest knockdown efficiency (**Supplementary File 1**) were cloned as a  
265 multi-miR construct into a lentiviral vector, downstream of a doxycycline inducible promoter  
266 and upstream of the GFP as a marker of activity. Purified concentrated lentiviruses containing  
267 this construct and the lentiviral vector expressing the TetOn3G protein were used to  
268 microinfect fertilized oocytes, which were reimplanted into pseudopregnant females (**Figure**  
269 **4A**). Of the 19 pups that we obtained with integration of both plasmids, two pups were  
270 expressing, after doxycycline treatment, the multi-miR in mTEChi and one pup was exhibiting  
271 a 60% reduction of *Clp1* mRNA levels in GFP+ (*Clp1* knockdown) versus GFP- (Ctr) mTEChi  
272 taken from the same mouse. These two cell populations, *Clp1* knockdown and no-knockdown  
273 Ctr mTEChi, were separated by GFP signal by FACS and processed for RNA-seq. We found  
274 higher d3'UTR ratios of Aire-sensitive genes in the *Clp1* knockdown mTEChi versus the Ctr  
275 mTEChi, whereas no difference was detected for Aire-neutral genes, therefore showing a  
276 specific effect of Clp1 on 3'UTR shortening at Aire-sensitive genes in mTEChi (**Figure 4B, Left**

277 and **Figure 4–source data 1**). As in the HEK293 *in vitro* experiments, we observed that the  
278 3'UTR ratios of the Aire-sensitive genes didn't reach the ratios of the Aire-neutral genes after  
279 *Clp1* knockdown, again due either to the incomplete 60% *Clp1* knockdown or to the existence  
280 of other non-*Clp1*-dependent differences.

281 We then compared the levels of expression of the Aire-sensitive genes with potential  
282 proximal pAs in Ctr versus *Clp1* knockdown mTEChi and found, in contrast to Aire-neutral  
283 genes, a significant reduction following *Clp1* knockdown (**Figure 4B, Right**). As observed in  
284 HEK293 cells, the effect of *Clp1* knockdown was dampened for the Aire-sensitive genes lacking  
285 potential proximal pAs (**Figure 4C**). We also found that the expression of the genes without  
286 proximal pAs was globally reduced in comparison to the genes with proximal pAs, supporting  
287 a linked mechanism between proximal pA usage and increased gene expression in mTEChi.  
288 Altogether these results showed that *Clp1* promotes 3'UTR shortening of the transcripts  
289 upregulated by Aire in mTEChi and strongly suggested that it enhances their level of  
290 expression through proximal pA usage.

291 A role for *Clp1* in mTEChi was further supported by its higher expression in mTEChi in  
292 comparison to a wide variety of tissues for which we collected RNA-seq datasets (Shen et al.,  
293 2012; van den Berghe et al., 2013; Warren et al., 2013) (**Figure 4D**). As a comparison, none of  
294 the other candidate factors, *Hnrnp1*, *Ddx5*, *Ddx17* and *Paprp1* that contributed to 3'UTR  
295 shortening in HEK293 cells, were over-represented in mTEChi (**Figure 4–figure supplement**  
296 **1**). Importantly, we also validated higher expression of *Clp1* at the protein level in mTEChi  
297 versus their precursor cells, mTEClo (Gäbler, Arnold, & Kyewski, 2007; Hamazaki et al., 2007),  
298 cells from the whole thymus, and also the predominant thymus CD45+ leukocyte fraction  
299 (**Figure 4–figure supplement 2**). In addition, a role for *Clp1* independent of Aire's action on  
300 genes expression was supported by the observed similar levels of *Clp1* expression in WT and

301 *Aire*-KO mTEChi (**Figure 4–figure supplement 3A**) and the lack of evidence for Aire and CLP1  
302 interaction (**Figure 4–figure supplement 3B**). Finally, we found a significant correlation  
303 between higher *Clp1* expression and lower d3'UTR ratios across peripheral tissues for the  
304 Aire-sensitive TRA genes (**Figure 4E, Top**). In contrast, no such significant correlation was  
305 observed for Aire-neutral genes (**Figure 4E, Bottom**). These findings indicate that the effect of  
306 Clp1 on 3'UTR shortening at Aire-sensitive genes is independent of Aire's action on gene  
307 expression, general across cell types, and conserved upon upregulation of gene expression by  
308 Aire in mTEChi.

309

310 **Clp1-driven 3'UTR shortening of Aire-upregulated transcripts is associated with higher**  
311 **stability in mTEChi**

312 To determine whether the effect of Clp1 on 3'UTR shortening of Aire-upregulated transcripts  
313 was associated with higher levels of these transcripts in mTEChi through increased stability,  
314 we assessed the stability of all transcripts in these cells. We used Actinomycin D (ActD) to  
315 inhibit new transcription (Sobell, 1985) and assessed the differences in transcript profiles  
316 between treated and untreated mTEChi. We harvested the cells at several timepoints for  
317 expression profiling by RNA-seq. Each RNA-seq dataset was normalized to total read counts  
318 and we calculated the expression fold-change of each gene in treated versus control samples,  
319 therefore reflecting differences in transcript levels in the absence of ongoing transcription.  
320 We selected among the Aire-sensitive genes two subsets: (i) those that underwent a higher  
321 than 2-fold d3'UTR ratio decrease in Ctr versus *Clp1* knockdown lentigenic mTEChi and, (ii)  
322 genes with steady d3'UTR ratios (**Figure 4–source data 1**). Comparison of the two gene sets  
323 in ActD-treated versus control samples revealed that the Aire-sensitive genes subject to Clp1-  
324 driven 3'UTR shortening were initially comparable in their changes in transcript levels upon

325 transcription inhibition to the changes for Aire-sensitive genes that showed no 3'UTR  
326 shortening but then showed increasing preservation of transcript levels at 3h and 6 or 12h,  
327 indicating a stabilization of this subset of 3'UTR-shortened transcripts (**Figure 5**;  $p=2.1 \times 10^{-4}$ ,  
328  $1.3 \times 10^{-12}$ , and  $5.6 \times 10^{-10}$  at 3, 6 and 12h, respectively). Therefore, the Clp1-promoted 3'UTR  
329 shortening at Aire-sensitive genes in mTEChi is indeed associated with higher transcript  
330 stability.

331

332

### 333 **Discussion**

334 Aire-sensitive genes upregulated by Aire in mTEChi have been shown to be controlled also by  
335 a number of Aire's allies or partners (Abramson et al., 2010; Giraud et al., 2014). Some of  
336 these factors have been reported to be part of the large 3' end processing complex (de Vries  
337 et al., 2000; Shi et al., 2009), notably Clp1 which belongs to the core 3' end processing sub-  
338 complex (de Vries et al., 2000; Mandel et al., 2008) and favors early cleavage and  
339 polyadenylation in some systems (Holbein et al., 2011; Johnson et al., 2011). In our present  
340 study, we demonstrated that Clp1 promotes 3'UTR shortening of the transcripts upregulated  
341 by Aire in mTEChi, and that these transcripts are associated with an enhanced stability,  
342 revealing a post-transcriptional mechanism whose escape leads to higher levels of expression  
343 of Aire-sensitive genes in mTEChi.

344 Comparison of RNA-seq expression profiles between *Clp1* knockdown and Ctr mTEChi  
345 isolated from *Clp1* lentigenic mice showed that Clp1 was able to promote 3'UTR shortening  
346 at Aire-sensitive genes specifically, thereby contributing to the preference of short-3'UTR  
347 transcript isoforms of Aire-sensitive genes versus Aire-neutral genes in WT mTEChi. We found  
348 that this 3'UTR shortening was driven by Clp1 in mTEChi but also in Aire-non-expressing

349 HEK293 cells, in which the level of Aire-sensitive gene expression is weak but still detectable  
350 by RNA-seq, thus showing that the effect of Clp1 on Aire-sensitive genes was not restricted  
351 to mTEChi nor dependent on Aire's action, but nonetheless specific to Aire-sensitive genes.  
352 Although Clp1 is a main contributor to this described process, additional factors might also  
353 be involved.

354

355 Clp1 is a ubiquitous protein showing higher expression in mTEChi than in mTEClo,  
356 CD45<sup>+</sup> thymic cells or thymic cells taken as a whole, but also showing higher gene expression  
357 in comparison with a large range of peripheral tissue cells. Interestingly, we found that the  
358 level of *Clp1* expression was also significantly high in 14.5 embryonic liver cells, cells that have  
359 been reported to undergo sustained cellular activation leading to proliferation and  
360 maturation into hepatocytes (Kung, Currie, Forbes, & Ross, 2010). Similarities with the pattern  
361 of mTEC development (Gray, Abramson, Benoist, & Mathis, 2007; Irla et al., 2008) might point  
362 out cell activation as a potent inducer of Clp1 expression. Notably, we showed that higher  
363 levels of *Clp1* expression were correlated with higher proportions of short-3'UTR transcript  
364 isoforms of tissue-restricted Aire-sensitive genes across peripheral tissues, suggesting the  
365 existence of a Clp1-promoted 3'UTR shortening mechanism occurring in a variety of cell types  
366 and, among those cell types we surveyed, most pronounced in mTEChi.

367 The observation that the levels of *Clp1* expression and the distributions of the short-  
368 3'UTR transcript isoforms of Aire-sensitive genes were similar between *Aire*-KO and WT  
369 mTEChi, strongly suggest that the Clp1-driven 3'UTR shortening mechanism is already in place  
370 in mTEChi before Aire is activated. The independence of Aire's action on gene expression and  
371 the effect of Clp1 on 3'UTR shortening is also consistent with the lack of direct interaction  
372 found between Aire and Clp1. Although these effects of Aire and Clp1 appear decoupled, it is



373 also apparent as noted that sensitivity to these Aire and Clp1 effects have a high-rate of co-  
374 occurrence in the same set of genes. Although we could detect and characterize the effect of  
375 Clp1 on the Aire-sensitive genes in mTEChi using annotated pAs from the PolyA\_DB 2  
376 database which mainly contains pAs identified from comparisons across peripheral tissues,  
377 the precise proportion of Aire-sensitive genes that are subject to differential pA usage and  
378 Clp1-driven shortening in mTEChi remains to be precisely defined. Current methods to  
379 capture mTEChi-specific pAs using next generation sequencing methods require very large  
380 numbers of cells relative to the number of mTEChi (~30,000) that can be isolated per mouse  
381 but emerging methods for accurate pA identification with lower input requirements could  
382 make this feasible from such low material quantity (W. Chen et al., 2017).

383

384 Clp1 is a member of the core 3' end processing complex that we showed to be  
385 preferentially located at proximal pAs of Aire-sensitive genes in HEK293 cells, indicating that  
386 the effect of Clp1 on 3'UTR shortening could result from enhanced recruitment of the 3' end  
387 processing complex to proximal pAs. Similar modes of action, involving members of the core  
388 3' end processing complex and resulting in transcripts with either shorter or longer 3'UTRs  
389 have been described for Clp1 in yeast (Johnson et al., 2011) and Cpsf6 in humans (Gruber,  
390 Martin, Keller, & Zavolan, 2012; Martin et al., 2012), respectively. However, the basis for the  
391 specificity of Clp1's effect for the Aire-sensitive genes remains unknown, but note that it does  
392 appear to be conserved across cell types. One possibility is that the regulatory elements and  
393 associated basal transcriptional machinery at Aire-sensitive genes share conserved features  
394 that favor recruitment of Clp1.

395

396           3'UTRs have been described as potent sensors of the post-transcriptional repression  
397 mediated by miRNAs, resulting in mRNA destabilization and degradation (Bartel, 2009; Jonas  
398 & Izaurralde, 2015). In addition to miRNAs, RNA-binding proteins (RBPs) also contribute the  
399 regulation of transcript stability depending on the type of cis regulatory elements that they  
400 recognize on 3'UTRs, triggering either repression or activation signals (Spies, Burge, & Bartel,  
401 2013). In mTEChi, we found increased stability of the Aire-sensitive transcripts that were  
402 subject to Clp1-promoted 3'UTR shortening. Thus, our findings supported an escape from the  
403 post-transcriptional repression of short-3'UTR transcripts in mTEChi, leading to enhanced  
404 stability and accumulation of these transcripts. Similar observations, resulting in increased  
405 transcript levels and higher protein translation, have notably been documented for genes  
406 subject to 3'UTR shortening whose long-3'UTR transcript isoforms were targeted by particular  
407 miRNAs or classes of RBPs (C. Y. Chen & Shyu, 1995; Guo, Ingolia, Weissman, & Bartel, 2010;  
408 Masamha et al., 2014; Mayr & Bartel, 2009; Vlasova et al., 2008).

409           In addition to impacting transcript stability through the escape of the post-  
410 transcriptional repression, short 3'UTRs have also been shown to shift the surface localization  
411 of membrane proteins and the functional cell compartment of other types of proteins, in  
412 favor of the endoplasmic reticulum (ER) (Berkovits & Mayr, 2015). Thus, one interesting  
413 hypothesis for future study is that Clp1-driven 3'UTR shortening at Aire-sensitive genes in  
414 mTEChi might not only impact the expression of Aire-dependent self-antigens but also favor  
415 their routing to the ER, from where they will be processed and presented, potentially  
416 enhancing their presentation to self-reactive T lymphocytes and, subsequently, central  
417 tolerance and protection against autoimmune manifestations.

418

419

## 420 **Materials and Methods**

### 421 **Mice**

422 *Aire*-deficient mice on the C57BL/6 (B6) genetic background (Anderson, 2002) were kindly  
423 provided by D. Mathis and C. Benoist (Harvard Medical School, Boston, MA), and wild-type  
424 B6 mice were purchased from Charles River Laboratories. Mice were housed, bred and  
425 manipulated in specific-pathogen-free conditions at Cochin Institute according to the  
426 guidelines of the French Veterinary Department and under procedures approved by the Paris-  
427 Descartes Ethical Committee for Animal Experimentation (decision CEEA34.MG.021.11 or  
428 APAFIS #3683 N° 2015062411489297 for lentigenic mouse generation).

429

### 430 **Isolation and analysis of medullary epithelial cells**

431 Thymi of 4-wk-old mice were dissected, trimmed of fat and connective tissue, chopped into  
432 small pieces and agitated to release thymocytes. Digestion with collagenase D (1 mg/mL final)  
433 (Roche) and DNase I (1 mg/mL final) (Sigma) was performed for 30 min at 37 °C. The remaining  
434 fragments were then treated with a collagenase/dispase mixture (2 mg/mL final) (Roche) and  
435 DNase I (2 mg/mL final) at 37 °C until a single-cell suspension was obtained. Cells were passed  
436 through 70- $\mu$ m mesh and resuspended in staining buffer (PBS containing 1% FBS and 5 mM  
437 EDTA). For isolation of medullary epithelial cells from pooled thymi, an additional step of  
438 thymocyte depletion was performed using magnetic CD45 MicroBeads (Miltenyi Biotec). The  
439 resuspended cells were incubated for 20 min at 4 °C with the fluorophore-labeled antibodies  
440 CD45-PerCPCy5.5 (1:50) (Biolegend), Ly51-PE (1:800) (Biolegend), and I-A/E-APC (1:1,200)  
441 (eBioscience). Sorting of mTEChi/lo (CD45<sup>-</sup>PE<sup>-</sup>I-A/E<sup>high/low</sup>) or, for lentigenic mice, of mTEChi  
442 +/- for GFP expression, was performed on a FACSAria III instrument (BD Bioscience). For Clp1  
443 staining, cells labeled for membrane antigens were fixed in (3.7%) formaldehyde for 15 min,

444 permeabilized in (0.5%) saponin for 15 min, and incubated with an antibody to Clp1 (1:100)  
445 (clone: EPR7181, GeneTex, GTX63930) and an Alexa Fluor 488-conjugated goat polyclonal  
446 antibody to rabbit (1:200) (ThermoFisher, A11008). Cells were analyzed on an Accuri C6  
447 instrument (BD Bioscience). All compensations were performed on single-color labeling of  
448 stromal cells and data analysis was done using the BD Accuri C6 Analysis software.

449

#### 450 **Actinomycin D treatment**

451 mTEChi were isolated and sorted ( $\sim 4 \times 10^5$ ) from pooled thymi of B6 mice as described above,  
452 then treated with actinomycin D (1  $\mu$ M) in MEM medium for 3, 6 and 12 hours at 37°C. The  
453 cells were then harvested and total RNA was isolated by TRIzol extraction (ThermoFisher).

454

#### 455 ***Aire*-transient transfections**

456 HEK293 cells were maintained in DMEM high glucose medium complemented with 10% FBS,  
457 L-glutamate, sodium pyruvate 1mM, non-essential amino acids and pen/strep antibiotics. The  
458 cells were seeded at a density of 600,000 per well in 6-well plates or at  $3.5 \times 10^6$  per 10-cm<sup>2</sup>  
459 culture dish. The next day, and depending on the dish format, HEK293 cells were transfected  
460 with either 2.5 or 8  $\mu$ g of the pCMV-*Aire*-Flag plasmid (or control plasmid) using 7.5 or 32  $\mu$ l  
461 of the TransIT-293 transfection reagent (Mirus). After 48h, cells cultured in 6-well plates were  
462 subjected to total RNA extraction for RNA-seq experiments, whereas those in the culture dish  
463 were subjected to protein extraction for coimmunoprecipitation.

464

#### 465 **Coimmunoprecipitation**

466 Extraction of nuclear proteins and coimmunoprecipitation were performed using the  
467 Universal Magnetic Co-IP Kit (Active Motif). Briefly, *Aire*-transfected HEK293 cells were lysed

468 with hypotonic buffer and incubated on ice for 15 min. Cell lysates were centrifuged for 30  
469 sec at 14,000 x g, then the nuclei pellets were digested with an enzymatic shearing cocktail  
470 for 10 min at 37°C. After centrifugation of the nuclear lysates, the supernatants containing  
471 the nuclear proteins were first incubated with specific antibodies for 4 hr, then with Protein-  
472 G magnetic beads for 1 hr at 4°C with rotation. After 4 washes, bound proteins were eluted  
473 in laemmli/DTT buffer, separated by SDS/PAGE for 40 min at 200 V, transferred to PVDF  
474 membranes using the TurboTransfer System for 7 min at 25 V (BioRad) and blocked for 1 hr  
475 with TBS, 0.05% Tween, 3% milk. The Western blot detection was done after incubation with  
476 primary (2 hr) and secondary antibodies (1 hr). Detection was performed by enhanced  
477 chemiluminescence (ECL). Antibodies used for immunoprecipitation or revelation were: CLP1  
478 (sc-243005, Santa Cruz), Flag-tag M2 (F1804, Sigma), goat IgG control (sc-2028, Santa Cruz),  
479 mouse IgG1 control (ab18443, Abcam), and horseradish peroxidase-conjugated anti-mouse  
480 IgG light chain specific (115-035-174, Jackson ImmunoResearch).

481

#### 482 **shRNA-mediated knockdown**

483 Specific knockdown of *CLP1*, *HNRNPL*, *DDX5*, *DDX17*, *PARP1*, *PRKDC*, *SUPT16H*, *PABPC1*,  
484 *CPSF6* and the control LacZ gene in HEK293 cells, or of *Clp1* in the 1C6 mouse thymic epithelial  
485 cell line (Mizuochi, Kasai, Kokuho, Kakiuchi, & Hirokawa, 1992) maintained in complemented  
486 DMEM high glucose medium, was performed by infection with lentivirus-expressing shRNAs.  
487 shRNAs were cloned into the lentivirus vector pLKO with an expression driven by the  
488 ubiquitously active U6 promoter, and were provided by the RNAi Consortium of the Broad  
489 Institute, as lentiviral particles at  $\sim 10^7$  VP/mL. For each candidate, we tested an average of 5  
490 specific shRNAs among those with the highest knockdown efficiency as measured by the RNAi  
491 platform of the Broad Institute.

492 HEK293 or 1C6 cells were seeded at a density of 250,000 or 650,000 per well in 6-well plates.  
493 The next day, cells were supplemented with 8mg/ml polybrene and infected with 20  $\mu$ L of  
494 shRNA-bearing lentiviruses. Each shRNA was tested in duplicate. The day after, the medium  
495 was changed to a fresh one containing 2  $\mu$ g/ml puromycin. Cells were maintained in selective  
496 medium during 6 days and harvested for RNA extraction using TRIzol (ThermoFischer).  
497 Knockdown efficiency was analyzed by real-time PCR – carried out in technical triplicate – in  
498 comparing the level of expression of each candidate in the knockdown vs. control samples  
499 using the human or murine GAPDH gene for normalization with primers listed in  
500 **Supplementary File 2**. First-strand cDNA was synthesized using SuperScript II Reverse  
501 Transcriptase (ThermoFischer) and oligo(dT)12-18 primers. cDNA was used for subsequent  
502 PCR amplification using the 7300 Real-Time PCR system (Applied Biosystems) and SYBR Green  
503 Select Master Mix (ThermoFisher). Knockdown efficiency of each specific shRNA was  
504 summarized in **Supplementary File 1**. We used for subsequent analyses the extracted RNA  
505 corresponding to the 3 shRNAs yielding the highest reduction of their target mRNA (>60%).

506

### 507 **Lentigenic mouse generation**

508 Three shRNAs against *Clp1* were cloned into a cluster of micro RNAs construct, the two most  
509 efficient shRNAs in two copies and the third in a single copy (**Supplementary File 1**). This  
510 construct was transferred to a lentiviral backbone, downstream of the doxycycline inducible  
511 promoter TRE3G and upstream of the ZsGreen protein. A second construct expressing the  
512 TetOn3G transactivator under the control of the EF1 promoter was generated. A single ultra-  
513 high purified and concentrated lentivector ( $2.2 \times 10^9$  TU/mL) containing both constructs was  
514 generated and purified by both Tangential Flow Filtration and Chromatography. Cloning and  
515 lentiviral production were performed by Vectalys ([www.vectalys.com](http://www.vectalys.com)). Fertilized oocytes (B6)

516 were microinjected under the zona pellucida with the lentivirus suspension as described  
517 (Giraud et al., 2014). A pool of 33 transduced oocytes were reimplanted into five  
518 pseudopregnant females. Newborns were selected for integration of both constructs by PCR  
519 with primers matching the ZsGreen or TetOn3G sequences (**Supplementary File 2**). At 3  
520 weeks of age, mice were treated with doxycycline food pellets (2 g/kg) for two weeks and  
521 then sacrificed for mTEChi isolation. Mice expressing GFP in >10% of mTEChi were selected  
522 for GFP+ and GFP- mTEChi RNA-seq.

523

### 524 **RNA-seq and d3'UTR ratios**

525 Total RNA was isolated by TRIzol extraction (ThermFisher) and was used to generate polyA-  
526 selected transcriptome libraries with the TruSeq RNA Library Prep Kit v2, following the  
527 manufacturer's protocol (Illumina). Sequencing was performed using the Illumina HiSeq 1000  
528 machine and was paired-end (2x100bp) for mTEChi and *Aire*-KO mTEChi isolated from pooled  
529 thymi. Sequencing was single-end (50bp) for transfected or knockdown HEK293 cells,  
530 actinomycin D-treated mTEChi, and mTEChi isolated from *Clp1* lentigenic mice. RNA libraries  
531 from thymic cells isolated from lentigenic mice or actinomycin D-treated mTEChi were  
532 constructed with the Smarter Ultra Low Input RNA kit (Clontech) combined to the Nextera  
533 library preparation kit (Illumina). Paired-end (100bp) datasets were homogenized to single-  
534 end (50bp) data by read-trimming and concatenation. Lower quality reads tagged by the  
535 Illumina's CASAVA 1.8 pipeline were filtered out and mapped to the mouse or human  
536 reference genome (mm9 or hg19) using the Bowtie aligner. For the multi-tissue comparison  
537 analysis, duplicate reads were removed with the Samtools rmdup function. For read counting,  
538 we used the intersectBed and coverageBed programs of the BEDtool distribution with the -f  
539 1 option. It enabled the count of reads strictly contained in each exon of the Refseq genes

540 whose annotation GTF file was downloaded from the UCSC web site  
541 (<http://hgdownload.cse.ucsc.edu/goldenPath/mm9> (or hg19) /database). Differential fold-  
542 change expression between two datasets was computed using DESeq and gene expression  
543 was quantified in each sample as reads per kilobase per million mapped reads (RPKM). For  
544 d3'UTR ratio calculation, we split the last annotated exon of genes harboring a proximal pA  
545 (as identified in the PolyA\_DB 2 database - [http://exon.umdj.edu/polya\\_db/v2/](http://exon.umdj.edu/polya_db/v2/)) in two  
546 distinct features and normalized the expression of the region downstream of the proximal pA  
547 to the one upstream. A proximal pA was validated when its genomic location from the  
548 PolyA\_DB 2 database differs from 20bp at least to the genomic location of the UCSC  
549 annotated 3'UTR distal boundary or distal pA. In case of multiple proximal pAs, the most  
550 proximal one was considered. d3'UTR annotation files in mice and humans for RNAseq  
551 analyses are provided in **Figure 1—source data 1**.

552

### 553 **Multi-tissue comparison analysis**

554 First, an RNA-seq database of mouse tissues was assembled in collecting 23 RNA-seq datasets  
555 generated from polyA-selected RNA and Illumina sequencing. The raw read sequences were  
556 obtained from the GEO database: GSE29278 for bone marrow, cerebellum, cortex, heart,  
557 intestine, kidney, liver, lung, olfactory, placenta, spleen, testes, mouse embryonic fibroblast  
558 (MEF), mouse embryonic stem cells (mESC), E14.5 brain, E14.5 heart, E14.5 limb and E14.5  
559 liver; GSE36026 for brown adipocytes tissue (BAT) and bone marrow derived macrophage  
560 (BMDM); GSM871703 for E14.5 telencephalon; GSM879225 for ventral tegmental area VTA.  
561 Reads of the VTA dataset, over 50bp in length, were trimmed for homogeneous comparison  
562 with our RNA-seq data. We processed each collected dataset for gene expression profiling  
563 and d3'UTR ratio computing as above. To avoid center-to-center biases, we removed from



564 the sequence assemblies the duplicate reads that could arise from PCR amplification errors  
565 during library construction. For multi-sample comparison analysis, our mTEChi datasets were  
566 also subjected to removal of duplicate reads.

567 Next, the tissue-specificity (one tissue of restricted expression) or selectivity (two-to-four  
568 tissues of restricted expression) of the Aire-sensitive genes was characterized by using the  
569 specificity measurement (SPM) and the contribution measurement (CTM) methods (Pan et  
570 al., 2013). For each gene, the SPM and the CTM values were dependent on its level of  
571 expression in each tissue. If no read was detected in a tissue, the latter was excluded from  
572 the comparison. For tissues of similar type, only the one showing the highest level of gene  
573 expression was included in the comparison. Cerebellum, cortex, E14.5 brain, E14.5  
574 telencephalon and VTA referred to a group, as well as did E14.5 heart and heart, or E14.5 liver  
575 and liver. If the SPM value of a gene for a tissue is  $> 0.9$ , then the gene is considered tissue-  
576 specific for this particular tissue. Otherwise, if the SPM values of a gene for two to four tissues  
577 were  $> 0.3$  and its CTM value for the corresponding tissues was  $> 0.9$ , then the gene was  
578 considered tissue-selective for these tissues. If these conditions were not met, the gene was  
579 left unassigned.

580 Finally, for the analysis of 3'UTR length variation of Aire-sensitive PTA genes between mTEChi  
581 and their tissues of expression, peripheral d3'UTR ratios of tissue-specific genes were selected  
582 in their unique identified tissues of expression. For tissue-selective genes, the d3'UTR ratios  
583 for peripheral tissues were selected randomly among their tagged tissues of expression.

584

### 585 **CLIP-seq analysis**

586 The location of the 3' end processing complex on the transcripts of Aire target genes was  
587 tracked by measuring the density of reads that map to these transcripts in PAR-CLIP

588 sequencing data of RNAs bound to the endogenous CSTF2 from the GEO database  
589 (GSM917676). We processed these assemblies of RNA-mapped reads by the sitepro program  
590 (CEAS distribution) to infer the read density at the vicinity of proximal and distal pAs of  
591 transcripts of Aire target genes in HEK293 cells. The Aire target genes were identified from  
592 RNA-seq data of control and *Aire*-transfected HEK293 cells. The genomic location of pAs on  
593 hg19 was extracted from the PolyA\_DB 2 database as above.

594

### 595 **Microarray gene expression profiling**

596 Total RNA was prepared from harvested knockdown HEK293 cells using TRIzol  
597 (ThermoFisher). Single-stranded DNA in the sense orientation was synthesized from total RNA  
598 with random priming using the GeneChip WT Amplification kit (Affymetrix). The DNA was  
599 subsequently purified, fragmented, and terminally labeled using the GeneChip WT Terminal  
600 Labeling kit (Affymetrix) incorporating biotinylated ribonucleotides into the DNA. The labeled  
601 DNA was then hybridized to Human Gene ST1.0 microarrays (Affymetrix), washed, stained,  
602 and scanned. Raw probe-level data (.CEL files) were normalized by the robust multiarray  
603 average (RMA) algorithm and summarized using the R-package *aroma.affymetrix*  
604 ([www.aroma-project.org/](http://www.aroma-project.org/)). d3'UTR annotation files in mice and humans for microarray  
605 analyses are provided in **Figure 1–source data 1**.

606

### 607 **Individual probe-level microarray analyses**

608 For each HEK293 samples of a microarray comparison, a probe-level expression file was  
609 generated using *aroma.affymetrix* just before the summarization step (see above). Probes  
610 with expression values over the background in each sample, had their hg19 genomic location  
611 retrieved from data of the Affymetrix NetAffx Web site, and were mapped to the d3'UTR

612 annotation file (generated above) using our R-implementation of PLATA (Giraud et al., 2012).  
613 d3'UTRs ratios were computed for genes having at least two individual probes in their d3'UTR  
614 regions by dividing the specific d3'UTR expression by the whole-transcript expression. We  
615 then tested between two HEK293 samples the proportion of genes with a significant increase  
616 or decrease of d3'UTR ratios to the proportion of those whose variation is not significant.

617

### 618 **Gene set enrichment analysis**

619 The overlap between the transcripts impacted by Aire in HEK293 cells and those impacted by  
620 the knockdown of *CLP1*, *HNRNPL*, *DDX5*, *DDX17*, *PARP1* was tested by the GSEA software  
621 (Subramanian et al., 2005) (Broad Institute). The Aire-sensitive genes were identified from  
622 RNA-seq data of control and *Aire*-transfected HEK293 cells. For this analysis, the top 30% of  
623 genes the most sensitive to Aire were considered.

624

### 625 **Statistical analysis**

626 Determination of the statistical significance differences between two experimental groups  
627 was done by the non-parametric Wilcoxon test, unless specified.

628

629

### 630 **Acknowledgments**

631 We thank Dr Sheena Pinto for her useful comments and suggestions, that have helped  
632 improve this paper. We thank Drs. D. Mathis and C. Benoist (Harvard Medical School) for *Aire*-  
633 KO (B6) mice. We thank members of the "Homologous recombination" core facility (Cochin  
634 Institute) for lentigenic generation. This work was supported by the Agence Nationale de la  
635 Recherche (ANR) 2011-CHEX-001-R12004KK (to M.G.), the European Commission CIG grant

636 PCIG9-GA-2011-294212 (to M.G.) and by the "Investissements d'Avenir" program managed  
637 by the ANR to the France Génomique national infrastructure ANR-10-INBS-09 (F.C.) and the  
638 French Institute of Bioinformatics ANR-11-INBS-0013 (C.B.). C.G. and Y.-C.L. were supported  
639 by fellowships from the Fondation pour la Recherche Médicale FDT20150532551 and  
640 ING20121226316, respectively. C.G., N.J. and M.G. designed the study and wrote the  
641 manuscript; C.G. and N.J. performed most of the experimental work; F.P. performed  
642 bioinformatics analyses and experiments, notably co-immunoprecipitations; F.P., Y.-C.L. and  
643 M.G. performed bioinformatics analyses; C.B. provided us with computing resources on the  
644 IFB national service infrastructure in bioinformatics and help with script optimization, O.U.  
645 and N.F. with RNA-seq and microarray datasets, and D.E.R. with lentivirus materials and  
646 editing of the manuscript.

647

## 648 **Competing interests**

649 The authors declare that they have no competing interests.

650

651

## 652 **References**

653

654 Abramson, J., Giraud, M., Benoist, C., & Mathis, D. (2010). Aire's partners in the molecular  
655 control of immunological tolerance. *Cell*, *140*(1), 123–135.

656 <http://doi.org/10.1016/j.cell.2009.12.030>

657

658 Anderson, M. S. (2002). Projection of an Immunological Self Shadow Within the Thymus by  
659 the Aire Protein. *Science (New York, NY)*, *298*(5597), 1395–1401.

660 <http://doi.org/10.1126/science.1075958>

661

662 Bartel, D. P. (2009). MicroRNAs: target recognition and regulatory functions. *Cell*, *136*(2),  
663 215–233. <http://doi.org/10.1016/j.cell.2009.01.002>

664

665 Berkovits, B. D., & Mayr, C. (2015). Alternative 3' UTRs act as scaffolds to regulate  
666 membrane protein localization. *Nature*, 522(7556), 363–367.  
667 <http://doi.org/10.1038/nature14321>

668

669 Chen, C. Y., & Shyu, A. B. (1995). AU-rich elements: characterization and importance in  
670 mRNA degradation. *Trends in Biochemical Sciences*, 20(11), 465–470.  
671 [http://doi.org/10.1016/s0968-0004\(00\)89102-1](http://doi.org/10.1016/s0968-0004(00)89102-1)

672

673 Chen, W., Jia, Q., Song, Y., Fu, H., Wei, G., & Ni, T. (2017). Alternative Polyadenylation:  
674 Methods, Findings, and Impacts. *Genomics, Proteomics & Bioinformatics*, 15(5), 287–  
675 300. <http://doi.org/10.1016/j.gpb.2017.06.001>

676

677 Colgan, D. F., & Manley, J. L. (1997). Mechanism and regulation of mRNA polyadenylation.  
678 *Genes & Development*, 11(21), 2755–2766. <http://doi.org/10.1101/gad.11.21.2755>

679

680 Cowan, J. E., Parnell, S. M., Nakamura, K., Caamano, J. H., Lane, P. J. L., Jenkinson, E. J., et al.  
681 (2013). The thymic medulla is required for Foxp3+ regulatory but not conventional CD4+  
682 thymocyte development. *The Journal of Experimental Medicine*, 210(4), 675–681.  
683 <http://doi.org/10.1084/jem.20122070>

684

685 Danan-Gotthold, M., Guyon, C., Giraud, M., Levanon, E. Y., & Abramson, J. (2016). Extensive  
686 RNA editing and splicing increase immune self-representation diversity in medullary  
687 thymic epithelial cells. *Genome Biology*, 17(1), 219. <http://doi.org/10.1186/s13059-016-1079-9>

688

689 de Vries, H., Rügsegger, U., Hübner, W., Friedlein, A., Langen, H., & Keller, W. (2000).  
690 Human pre-mRNA cleavage factor II(m) contains homologs of yeast proteins and bridges  
691 two other cleavage factors. *The EMBO Journal*, 19(21), 5895–5904.  
692 <http://doi.org/10.1093/emboj/19.21.5895>

693

694 Derbinski, J., Schulte, A., Kyewski, B., & Klein, L. (2001). Promiscuous gene expression in  
695 medullary thymic epithelial cells mirrors the peripheral self. *Nature Immunology*, 2(11),  
696 1032–1039. <http://doi.org/10.1038/ni723>

697

698 Derti, A., Garrett-Engle, P., Macisaac, K. D., Stevens, R. C., Sriram, S., Chen, R., et al. (2012).  
699 A quantitative atlas of polyadenylation in five mammals. *Genome Research*, 22(6),  
700 1173–1183. <http://doi.org/10.1101/gr.132563.111>

701

702 Gäbler, J., Arnold, J., & Kyewski, B. (2007). Promiscuous gene expression and the  
703 developmental dynamics of medullary thymic epithelial cells. *European Journal of*  
704 *Immunology*, 37(12), 3363–3372. <http://doi.org/10.1002/eji.200737131>

705

706 Giraud, M., Jmari, N., Du, L., Carallis, F., Nieland, T. J. F., Perez-Campo, F. M., et al. (2014).  
707 An RNAi screen for Aire cofactors reveals a role for Hnrnp1 in polymerase release and  
708 Aire-activated ectopic transcription. *Proceedings of the National Academy of Sciences of*  
709

- 710 *the United States of America*, 111(4), 1491–1496.  
711 <http://doi.org/10.1073/pnas.1323535111>  
712
- 713 Giraud, M., Yoshida, H., Abramson, J., Rahl, P. B., Young, R. A., Mathis, D., & Benoist, C.  
714 (2012). Aire unleashes stalled RNA polymerase to induce ectopic gene expression in  
715 thymic epithelial cells. *Proceedings of the National Academy of Sciences of the United*  
716 *States of America*, 109(2), 535–540. <http://doi.org/10.1073/pnas.1119351109>  
717
- 718 Goodnow, C. C., Sprent, J., Fazekas de St Groth, B., & Vinuesa, C. G. (2005). Cellular and  
719 genetic mechanisms of self tolerance and autoimmunity. *Nature*, 435(7042), 590–597.  
720 <http://doi.org/10.1038/nature03724>  
721
- 722 Gray, D., Abramson, J., Benoist, C., & Mathis, D. (2007). Proliferative arrest and rapid  
723 turnover of thymic epithelial cells expressing Aire. *Journal of Experimental Medicine*,  
724 204(11), 2521–2528. <http://doi.org/10.1084/jem.20070795>  
725
- 726 Gruber, A. R., Martin, G., Keller, W., & Zavolan, M. (2012). Cleavage factor Im is a key  
727 regulator of 3' UTR length. *RNA Biology*, 9(12), 1405–1412.  
728 <http://doi.org/10.4161/rna.22570>  
729
- 730 Guo, H., Ingolia, N. T., Weissman, J. S., & Bartel, D. P. (2010). Mammalian microRNAs  
731 predominantly act to decrease target mRNA levels. *Nature*, 466(7308), 835–840.  
732 <http://doi.org/10.1038/nature09267>  
733
- 734 Hamazaki, Y., Fujita, H., Kobayashi, T., Choi, Y., Scott, H. S., Matsumoto, M., & Minato, N.  
735 (2007). Medullary thymic epithelial cells expressing Aire represent a unique lineage  
736 derived from cells expressing claudin. *Nature Immunology*, 8(3), 304–311.  
737 <http://doi.org/10.1038/ni1438>  
738
- 739 Holbein, S., Scola, S., Loll, B., Dichtl, B. S., Hübner, W., Meinhart, A., & Dichtl, B. (2011). The  
740 P-loop domain of yeast Clp1 mediates interactions between CF IA and CPF factors in  
741 pre-mRNA 3' end formation. *PloS One*, 6(12), e29139.  
742 <http://doi.org/10.1371/journal.pone.0029139>  
743
- 744 Hoque, M., Ji, Z., Zheng, D., Luo, W., Li, W., You, B., et al. (2013). Analysis of alternative  
745 cleavage and polyadenylation by 3' region extraction and deep sequencing. *Nature*  
746 *Methods*, 10(2), 133–139. <http://doi.org/10.1038/nmeth.2288>  
747
- 748 Irla, M., Hugues, S., Gill, J., Nitta, T., Hikosaka, Y., Williams, I. R., et al. (2008). Autoantigen-  
749 Specific Interactions with CD4+ Thymocytes Control Mature Medullary Thymic Epithelial  
750 Cell Cellularity. *Immunity*, 29(3), 451–463. <http://doi.org/10.1016/j.immuni.2008.08.007>  
751
- 752 Johnson, S. A., Kim, H., Erickson, B., & Bentley, D. L. (2011). The export factor Yra1  
753 modulates mRNA 3' end processing. *Nature Structural & Molecular Biology*, 18(10),  
754 1164–1171. <http://doi.org/10.1038/nsmb.2126>  
755

- 756 Jonas, S., & Izaurralde, E. (2015). Towards a molecular understanding of microRNA-  
757 mediated gene silencing. *Nature Reviews. Genetics*, 16(7), 421–433.  
758 <http://doi.org/10.1038/nrg3965>  
759
- 760 Klein, L., Kyewski, B., Allen, P. M., & Hogquist, K. A. (2014). Positive and negative selection of  
761 the T cell repertoire: what thymocytes see (and don't see). *Nature Reviews Immunology*,  
762 14(6), 377–391. <http://doi.org/10.1038/nri3667>  
763
- 764 König, J., Zarnack, K., Luscombe, N. M., & Ule, J. (2012). Protein-RNA interactions: new  
765 genomic technologies and perspectives. *Nature Reviews. Genetics*, 13(2), 77–83.  
766 <http://doi.org/10.1038/nrg3141>  
767
- 768 Kung, J. W. C., Currie, I. S., Forbes, S. J., & Ross, J. A. (2010). Liver development,  
769 regeneration, and carcinogenesis. *Journal of Biomedicine & Biotechnology*, 2010,  
770 984248. <http://doi.org/10.1155/2010/984248>  
771
- 772 Kyewski, B., & Klein, L. (2006). A central role for central tolerance. *Annual Review of*  
773 *Immunology*, 24(1), 571–606.  
774 <http://doi.org/10.1146/annurev.immunol.23.021704.115601>  
775
- 776 Lee, J. Y., Yeh, I., Park, J. Y., & Tian, B. (2007). PolyA\_DB 2: mRNA polyadenylation sites in  
777 vertebrate genes. *Nucleic Acids Research*, 35(Database), D165–D168.  
778 <http://doi.org/10.1093/nar/gkl870>  
779
- 780 Li, W., You, B., Hoque, M., Zheng, D., Luo, W., Ji, Z., et al. (2015). Systematic profiling of  
781 poly(A)+ transcripts modulated by core 3' end processing and splicing factors reveals  
782 regulatory rules of alternative cleavage and polyadenylation. *PLoS Genetics*, 11(4),  
783 e1005166. <http://doi.org/10.1371/journal.pgen.1005166>  
784
- 785 Mandel, C. R., Bai, Y., & Tong, L. (2008). Protein factors in pre-mRNA 3'-end processing.  
786 *Cellular and Molecular Life Sciences : CMLS*, 65(7-8), 1099–1122.  
787 <http://doi.org/10.1007/s00018-007-7474-3>  
788
- 789 Martin, G., Gruber, A. R., Keller, W., & Zavolan, M. (2012). Genome-wide analysis of pre-  
790 mRNA 3' end processing reveals a decisive role of human cleavage factor I in the  
791 regulation of 3' UTR length. *Cell Reports*, 1(6), 753–763.  
792 <http://doi.org/10.1016/j.celrep.2012.05.003>  
793
- 794 Masamha, C. P., Xia, Z., Yang, J., Albrecht, T. R., Li, M., Shyu, A.-B., et al. (2014). CFIm25 links  
795 alternative polyadenylation to glioblastoma tumour suppression., *510(7505)*, 412–416.  
796 <http://doi.org/10.1038/nature13261>  
797
- 798 Mayr, C., & Bartel, D. P. (2009). Widespread shortening of 3'UTRs by alternative cleavage  
799 and polyadenylation activates oncogenes in cancer cells. *Cell*, 138(4), 673–684.  
800 <http://doi.org/10.1016/j.cell.2009.06.016>  
801

- 802 Millevoi, S., & Vagner, S. (2010). Molecular mechanisms of eukaryotic pre-mRNA 3' end  
803 processing regulation. *Nucleic Acids Research*, 38(9), 2757–2774.  
804 <http://doi.org/10.1093/nar/gkp1176>  
805
- 806 Mizuochi, T., Kasai, M., Kokuho, T., Kakiuchi, T., & Hirokawa, K. (1992). Medullary but not  
807 cortical thymic epithelial cells present soluble antigens to helper T cells. *Journal of*  
808 *Experimental Medicine*, 175(6), 1601–1605. <http://doi.org/10.1084/jem.175.6.1601>  
809
- 810 Nagamine, K., Peterson, P., Scott, H. S., Kudoh, J., Minoshima, S., Heino, M., et al. (1997).  
811 Positional cloning of the APECED gene. *Nature Genetics*, 17(4), 393–398.  
812 <http://doi.org/10.1038/ng1297-393>  
813
- 814 Pan, J.-B., Hu, S.-C., Shi, D., Cai, M.-C., Li, Y.-B., Zou, Q., & Ji, Z.-L. (2013). PaGenBase: a  
815 pattern gene database for the global and dynamic understanding of gene function. *PLoS*  
816 *One*, 8(12), e80747. <http://doi.org/10.1371/journal.pone.0080747>  
817
- 818 Peterson, P., Pitkänen, J., SILLANPAA, N., & Krohn, K. (2004). Autoimmune  
819 polyendocrinopathy candidiasis ectodermal dystrophy (APECED): a model disease to  
820 study molecular aspects of endocrine autoimmunity. *Clinical and Experimental*  
821 *Immunology*, 135(3), 348–357. <http://doi.org/10.1111/j.1365-2249.2004.02384.x>  
822
- 823 Sansom, S. N., Shikama-Dorn, N., Zhanybekova, S., Nusspaumer, G., Macaulay, I. C.,  
824 Deadman, M. E., et al. (2014). Population and single-cell genomics reveal the Aire  
825 dependency, relief from Polycomb silencing, and distribution of self-antigen expression  
826 in thymic epithelia. *Genome Research*, 24(12), 1918–1931.  
827 <http://doi.org/10.1101/gr.171645.113>  
828
- 829 Shen, Y., Yue, F., McCleary, D. F., Ye, Z., Edsall, L., Kuan, S., et al. (2012). A map of the cis-  
830 regulatory sequences in the mouse genome. *Nature*, 488(7409), 116–120.  
831 <http://doi.org/10.1038/nature11243>  
832
- 833 Shi, Y., Di Giammartino, D. C., Taylor, D., Sarkeshik, A., Rice, W. J., Yates, J. R., et al. (2009).  
834 Molecular architecture of the human pre-mRNA 3' processing complex. *Molecular Cell*,  
835 33(3), 365–376. <http://doi.org/10.1016/j.molcel.2008.12.028>  
836
- 837 Sobell, H. M. (1985). Actinomycin and DNA transcription. *Proceedings of the National*  
838 *Academy of Sciences*, 82(16), 5328–5331. <http://doi.org/10.1073/pnas.82.16.5328>  
839
- 840 Spies, N., Burge, C. B., & Bartel, D. P. (2013). 3' UTR-isoform choice has limited influence on  
841 the stability and translational efficiency of most mRNAs in mouse fibroblasts. *Genome*  
842 *Research*, 23(12), 2078–2090. <http://doi.org/10.1101/gr.156919.113>  
843
- 844 Subramanian, A., Tamayo, P., Mootha, V. K., Mukherjee, S., Ebert, B. L., Gillette, M. A., et al.  
845 (2005). Gene set enrichment analysis: a knowledge-based approach for interpreting  
846 genome-wide expression profiles. *Proceedings of the National Academy of Sciences*,  
847 102(43), 15545–15550. <http://doi.org/10.1073/pnas.0506580102>  
848



- 849 Tian, B., & Manley, J. L. (2013). Alternative cleavage and polyadenylation: the long and short  
850 of it. *Trends in Biochemical Sciences*, 38(6), 312–320.  
851 <http://doi.org/10.1016/j.tibs.2013.03.005>  
852
- 853 van den Berghe, V., Stappers, E., Vandesande, B., Dimidschstein, J., Kroes, R., Francis, A., et  
854 al. (2013). Directed migration of cortical interneurons depends on the cell-autonomous  
855 action of Sip1. *Neuron*, 77(1), 70–82. <http://doi.org/10.1016/j.neuron.2012.11.009>  
856
- 857 Vlasova, I. A., Tahoe, N. M., Fan, D., Larsson, O., Rattenbacher, B., Sternjohn, J. R., et al.  
858 (2008). Conserved GU-rich elements mediate mRNA decay by binding to CUG-binding  
859 protein 1. *Molecular Cell*, 29(2), 263–270. <http://doi.org/10.1016/j.molcel.2007.11.024>  
860
- 861 Warren, B. L., Vialou, V. F., Iñiguez, S. D., Alcantara, L. F., Wright, K. N., Feng, J., et al. (2013).  
862 Neurobiological sequelae of witnessing stressful events in adult mice. *Biological*  
863 *Psychiatry*, 73(1), 7–14. <http://doi.org/10.1016/j.biopsych.2012.06.006>  
864

Figure 1

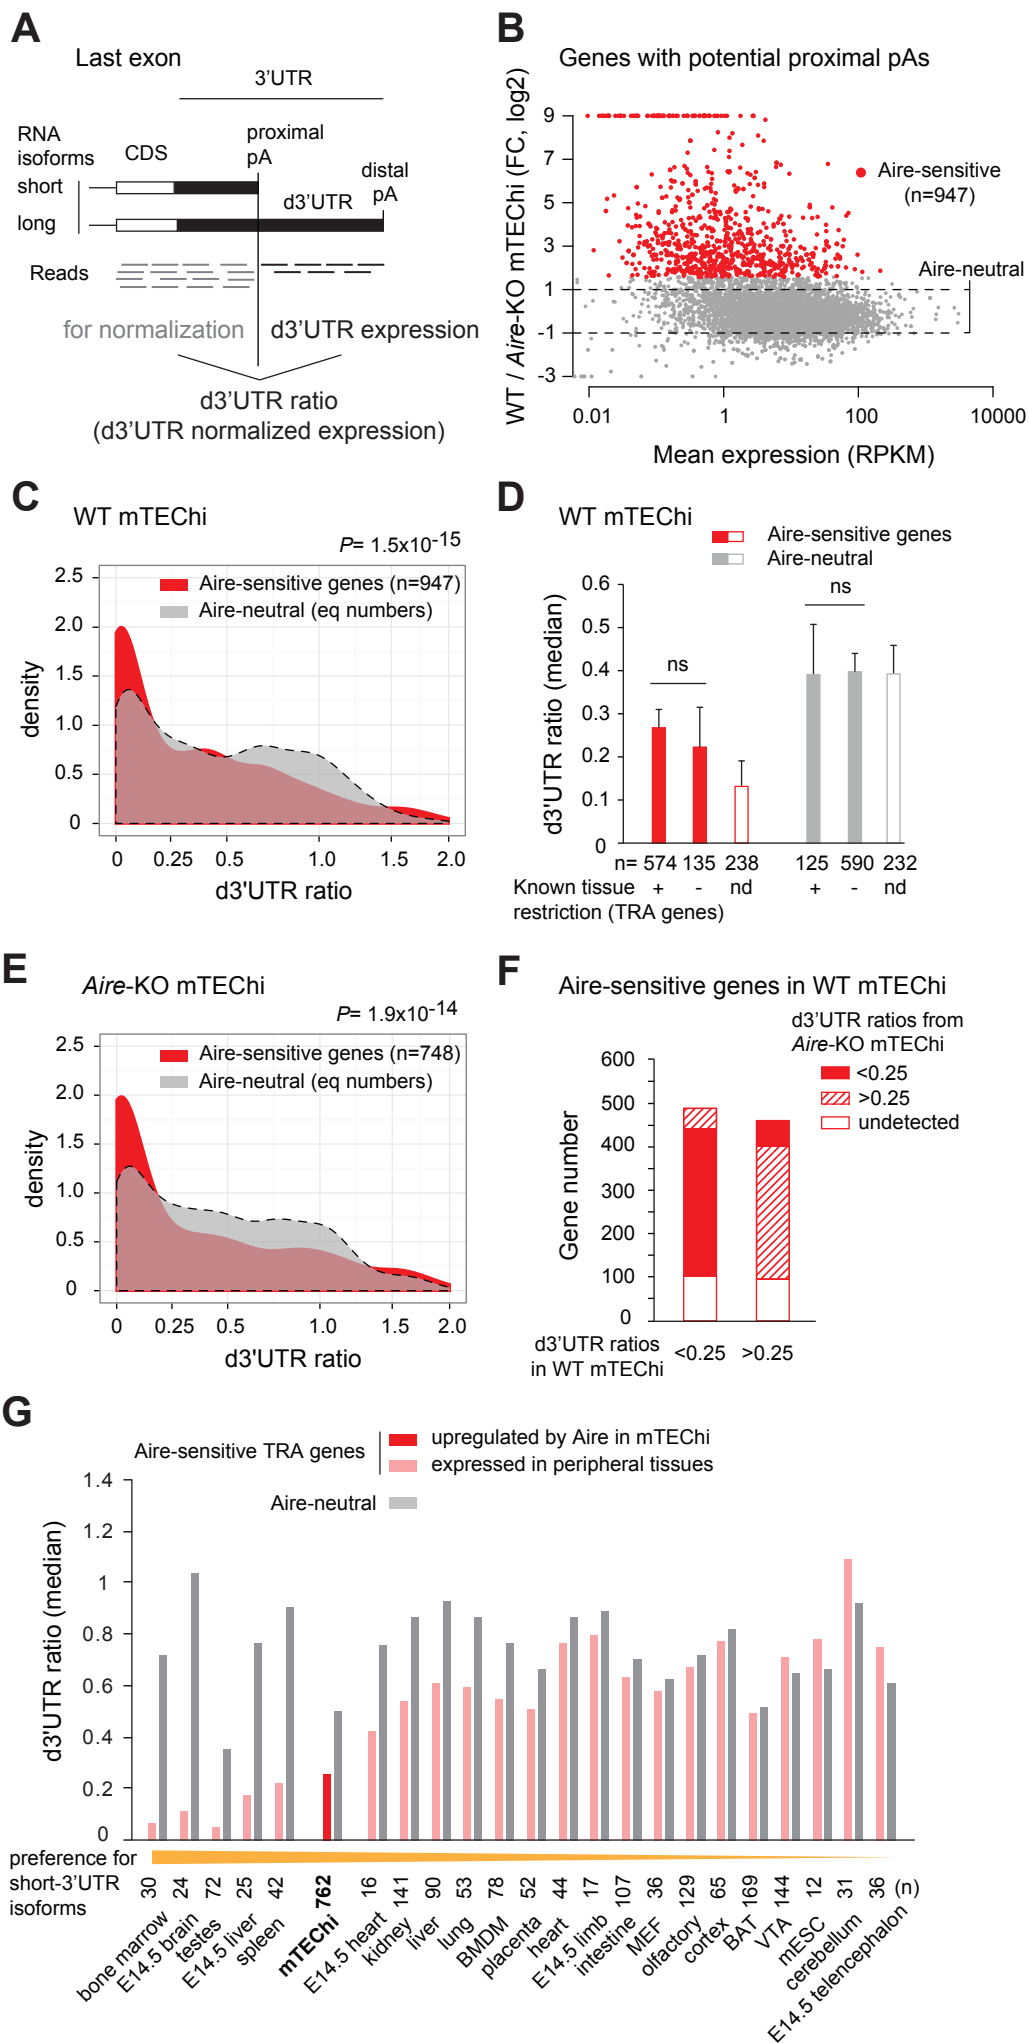

Figure 2

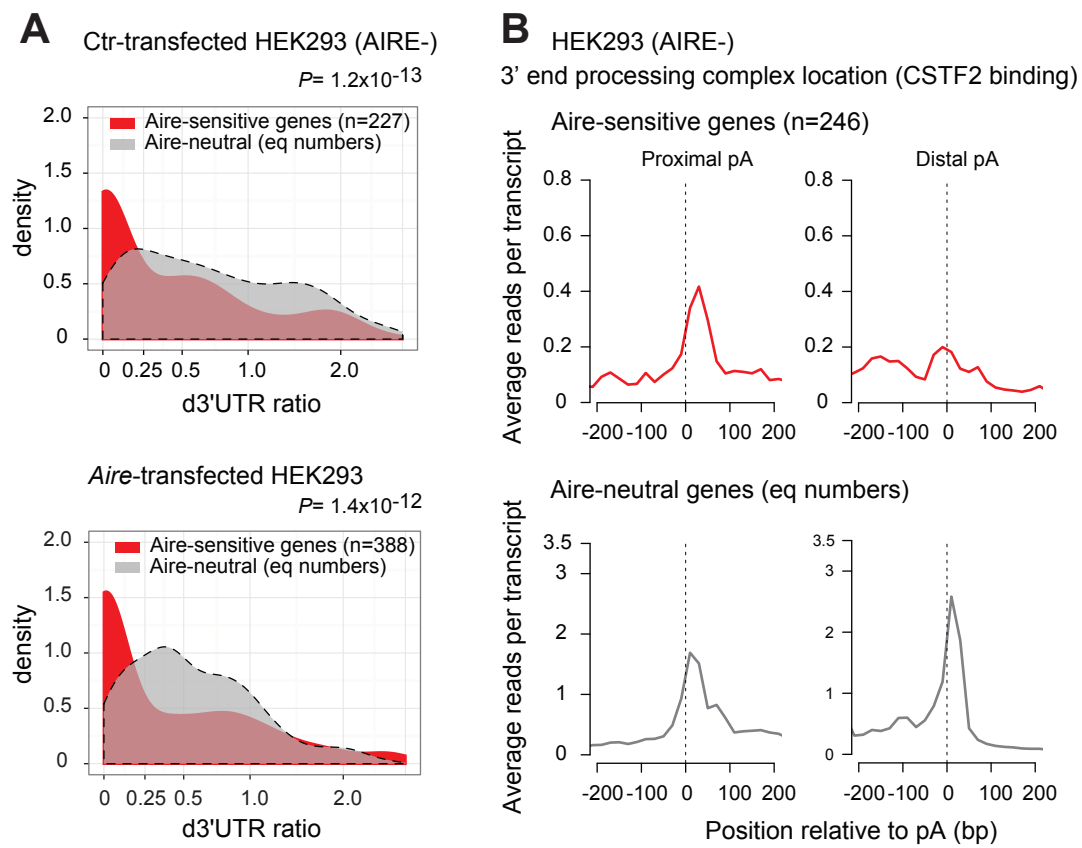

## Figure 3

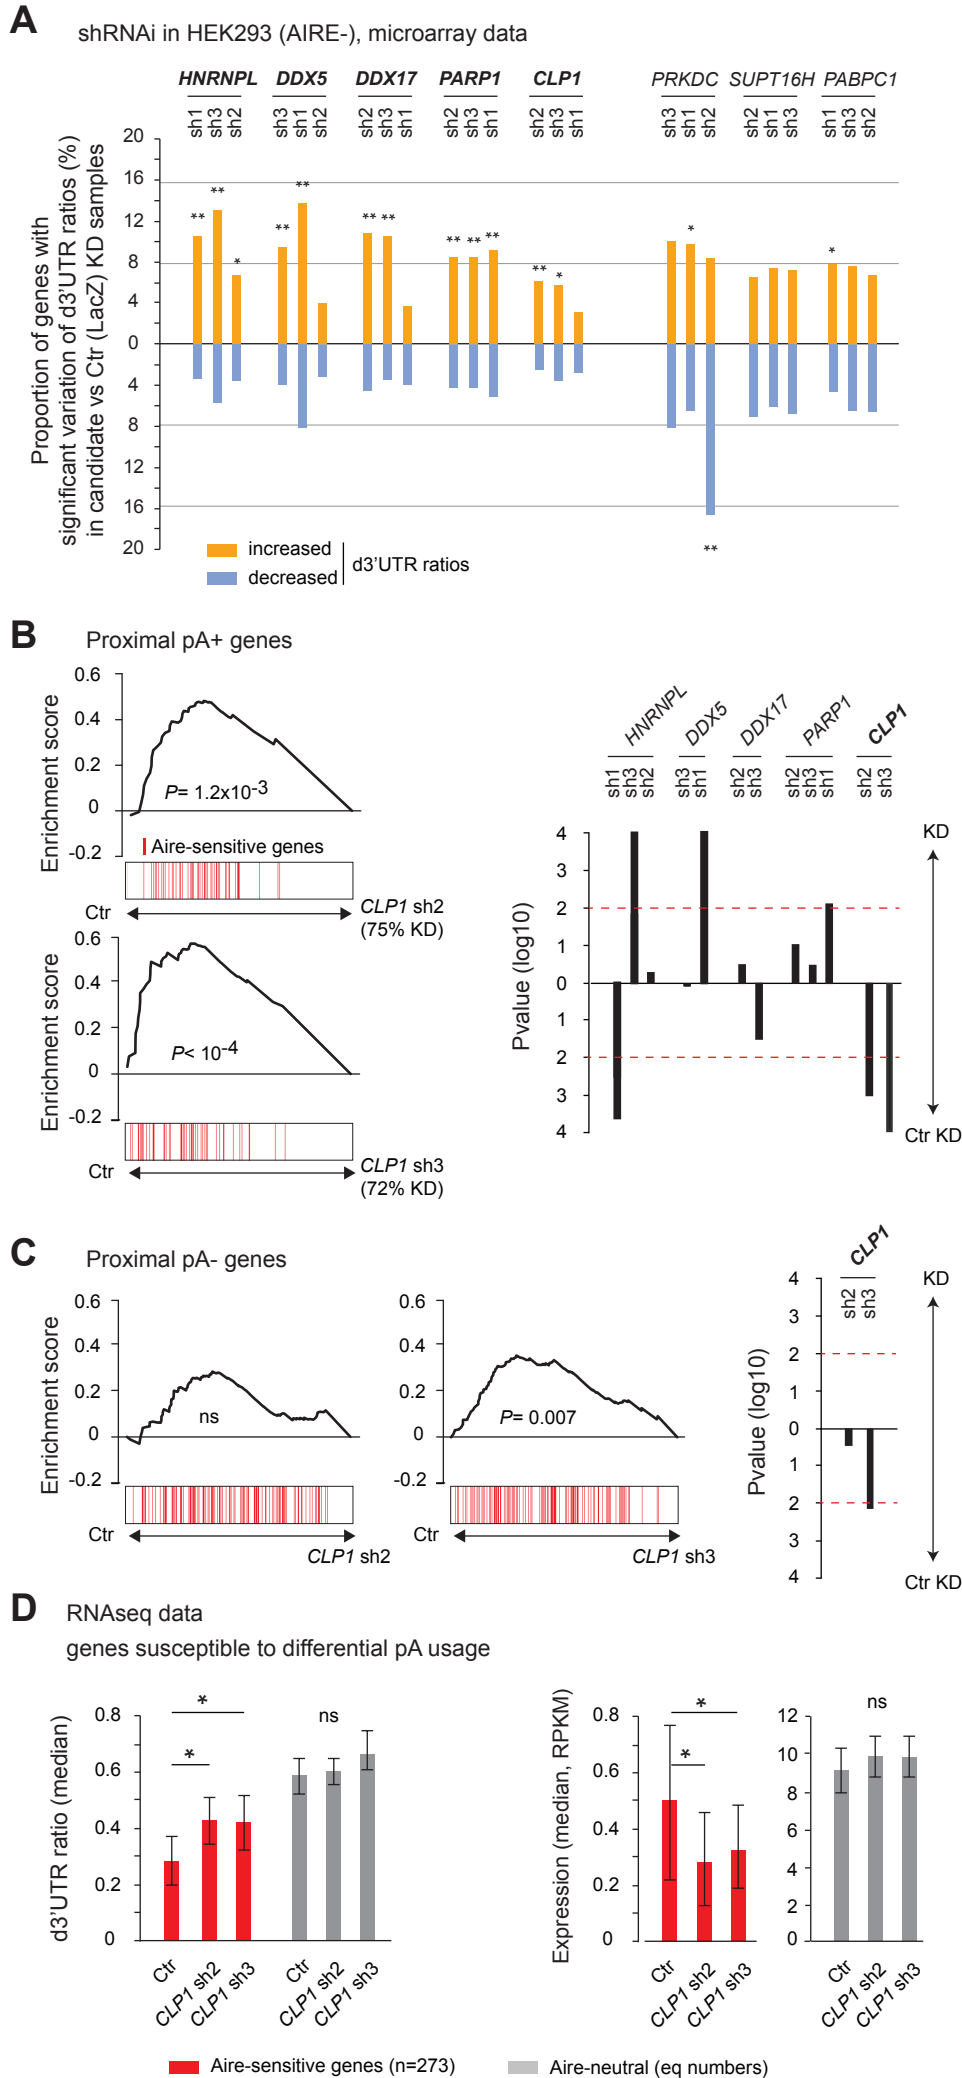

Figure 4

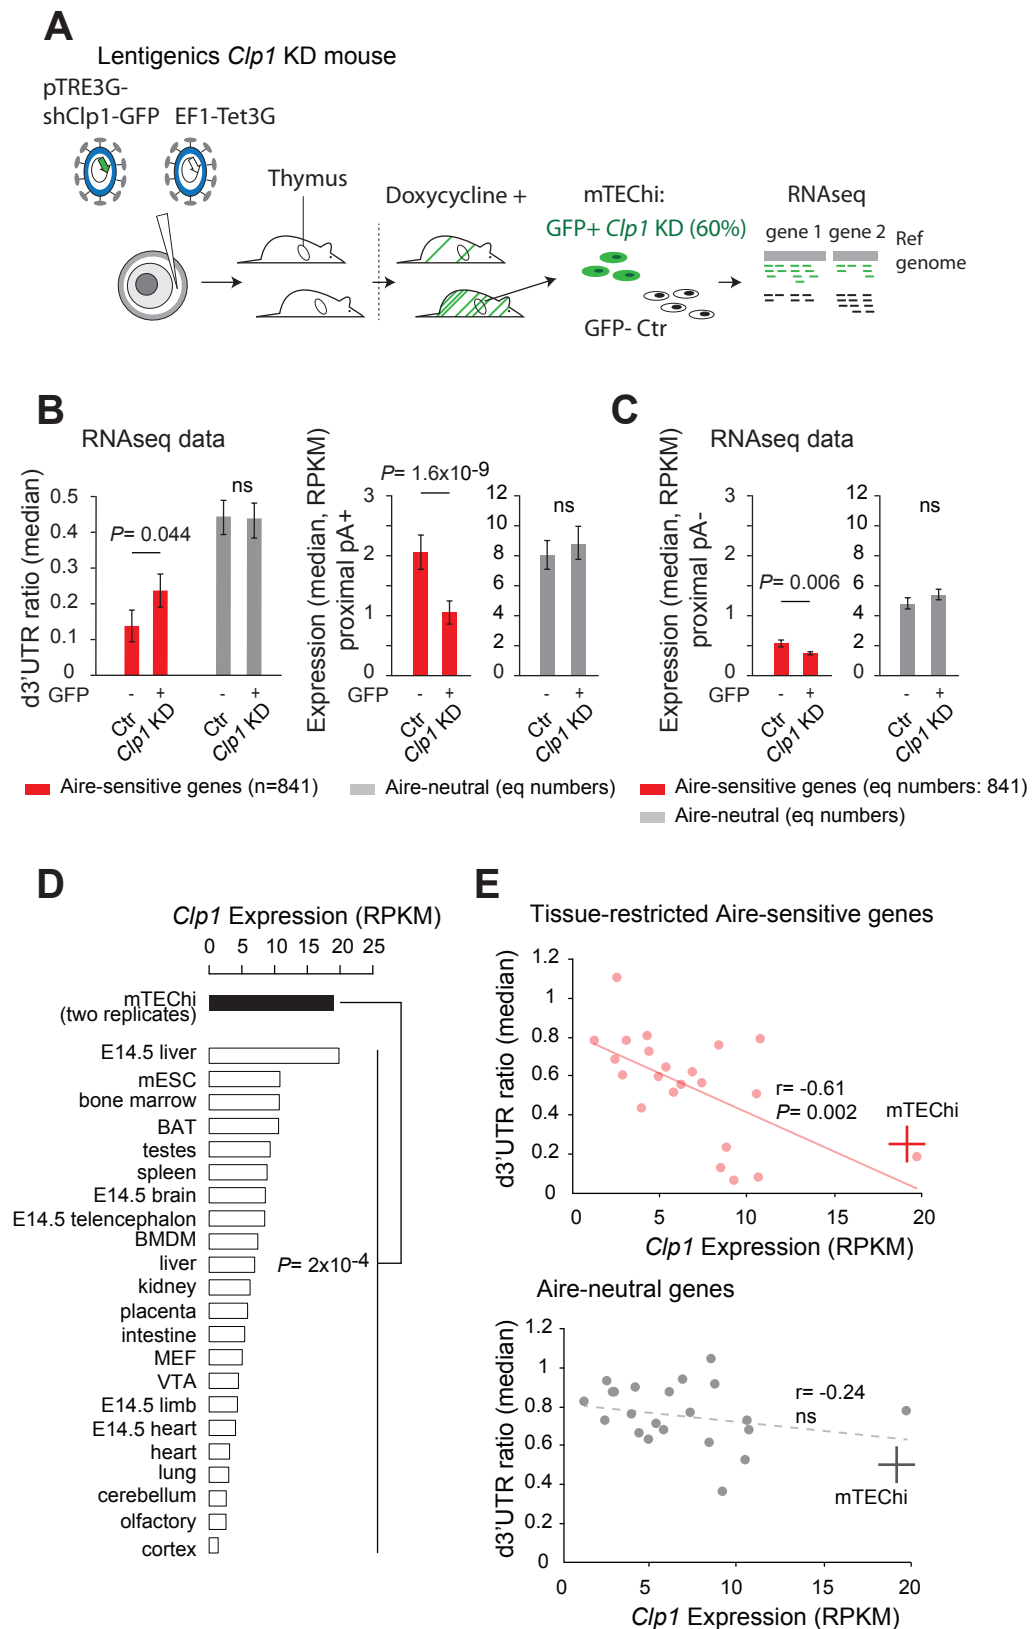

Figure 5

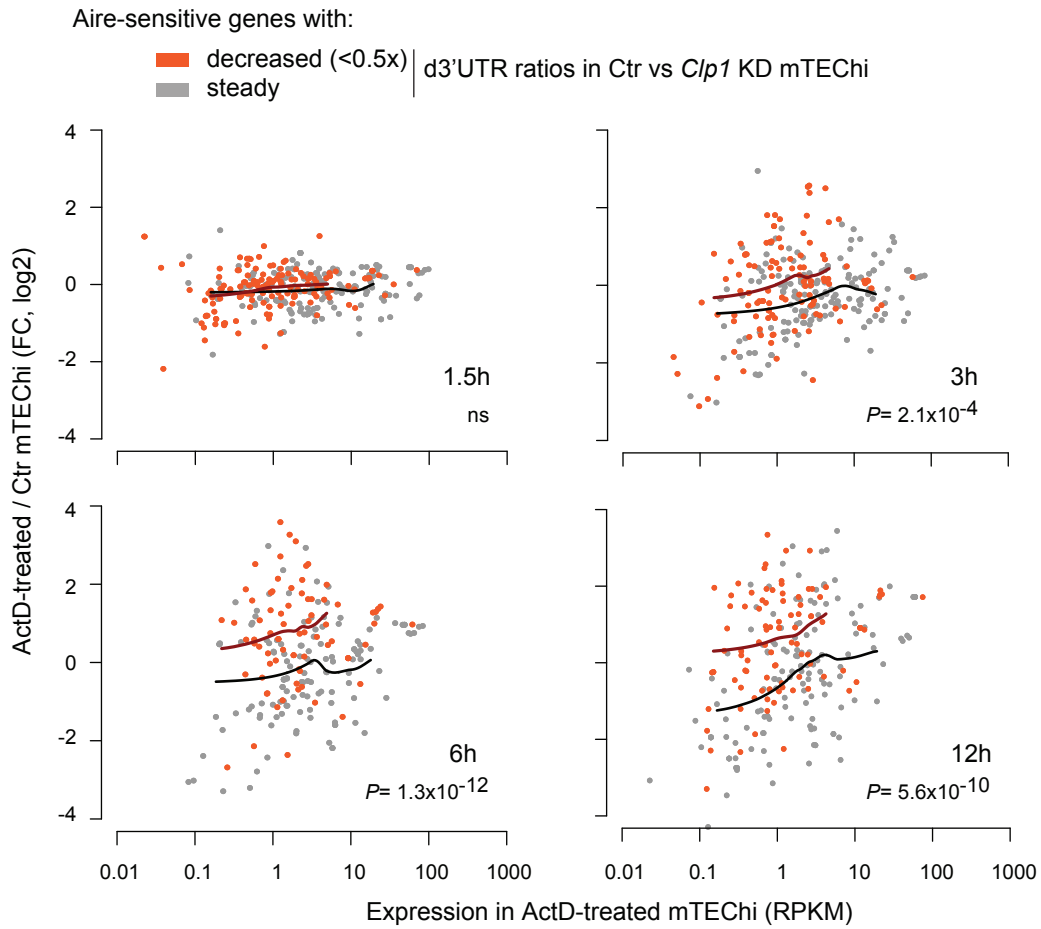

## Figure legends

### Figure 1. Preference of Aire-sensitive genes for short-3'UTR transcript isoforms in mTEChi and in some peripheral cells.

(A) Schematic of pA usage and 3'UTR isoform expression. 3' ends of RNA isoforms of a hypothetical gene are shown. Usage of the proximal pA results in a reduced proportion of the long 3'UTR isoform, estimated by the d3'UTR ratio. (B) RNA-seq differential expression (fold-change) between WT and *Aire*-KO mTEChi sorted from a pool of 4 thymi. Red dots show genes upregulated by threefold or more (Z-score criterion of  $P < 0.01$ ) (Aire-sensitive). Genes between the dashed lines have a change in expression less than twofold (Aire-neutral). (C) Densities of d3'UTR ratios of Aire-sensitive genes upregulated by Aire in mTEChi and of Aire-neutral genes; equal number ( $n=947$ ) of neutral genes included, asinh scale. (D) Median of d3'UTR ratios of Aire-sensitive and neutral genes depending on whether their peripheral expression is tissue-restricted, or not. Genes whose classification is not established are called "not determined" (nd) and represented by an open box. (E) Densities of d3'UTR ratios of Aire-sensitive and neutral genes in *Aire*-KO mTEChi; equal number ( $n=748$ ) of neutral genes included, asinh scale. (F) Proportion of Aire-sensitive genes with d3'UTR ratios  $<0.25$  or  $>0.25$  in *Aire*-KO mTEChi among those with d3'UTR ratios  $<0.25$  or  $>0.25$  in WT mTEChi. (G) Median of d3'UTR ratios calculated from RNA-seq data for Aire-sensitive genes with tissue-restricted expression and Aire-neutral genes in mTEChi and 22 mouse tissues. Duplicate reads were discarded to allow more accurate dataset comparison. Cell types were arranged in descending order based on their preference for short-3'UTR isoforms assessed by dividing the median of d3'UTR ratios of Aire-neutral genes (gray) by the one of Aire-sensitive genes (pink or red) in each cell type.

**Figure 2. Increased binding of the 3' end processing complex at proximal pAs of Aire-sensitive genes in HEK293 cells.**

(A) Densities in Ctr-transfected HEK293 cells (AIRE-) (*Top*) and *Aire*-transfected HEK293 cells (*Bottom*) of d3'UTR ratios from RNA-seq data of Aire-sensitive and neutral genes identified after *Aire* transfection; equal numbers of neutral genes included (n=227 and n=388, respectively), asinh scale. (B) Average density of reads from PAR-CLIP analyses in HEK293 cells (AIRE-) of CSTF2 protein as a marker of the 3' end processing complex, in the vicinity of proximal and distal pAs of Aire-sensitive and neutral genes. Equal number (n=246) of neutral genes included.

**Figure 3. CLP1 controls the expression of Aire-sensitive genes with proximal pAs and their shortening in HEK293 cells.**

(A) Individual probe-level analysis of microarray data from knockdown and control HEK293 cells. Vertical bars represent the proportion of genes with a significant increase or decrease of d3'UTR ratios in the candidate vs. Ctr (LacZ) knockdown samples. \*  $P < 10^{-4}$ , \*\*  $P < 10^{-9}$  (Chi-squared test). (B),(C) Gene Set Enrichment Analysis of Aire-sensitive genes among Ctr (LacZ) vs *CLP1* KD ranked expression datasets of all genes with (B) or without (C) potential proximal pAs in their 3'UTRs as identified in the PolyA\_DB 2 database. Significance and direction of the enrichment is shown for each hit shRNA, as well as *P* value thresholds of 0.01 by horizontal red dashed lines (*Right*). (D) Median of d3'UTR ratios (*Left*) and expression values (*Right*) from RNA-seq data of Aire-sensitive and neutral genes in HEK293 cells infected by lentiviruses containing *CLP1* hit shRNAs or the Ctr (LacZ) shRNA; equal number (n=273) of neutral genes included, error bars show the 95% confidence interval of the medians. \*  $P < 0.05$ .



**Figure 4. Clp1 controls the expression of Aire-upregulated genes with proximal pAs and their shortening in mTEChi.**

(A) Schematic of the lentigenic knockdown strategy. shRNAs against *Clp1* were transferred to a doxycycline-inducible expression system for microinfection of fertilized oocytes under the zona pellucid. The resulting pups were screened for integration of the constructs and, after treatment by doxycycline, for GFP expression in mTEChi. GFP+ and GFP- mTEChi were sorted and their transcripts profiled by RNA-seq. (B) Median of d3'UTR ratios (*Left*) and expression values (*Right*) from RNA-seq data of Aire-sensitive and neutral genes with proximal pAs in GFP+ and GFP- mTEChi from a lentigenic mouse with GFP as a marker of *Clp1* knockdown activity; equal numbers (n=841) of neutral genes included. (C) Expression values of Aire-sensitive and neutral genes without proximal pAs in GFP+ and GFP- mTEChi; numbers of included genes (n=841). (D) *Clp1* expression from RNA-seq data of two replicate mTEChi and of 22 mouse tissues; median, log<sub>10</sub> scale. BAT stands for brown adipocytes tissue, BMDM for bone marrow derived macrophage, MEF for mouse embryonic fibroblast, mESC for mouse embryonic stem cells and VTA for ventral tegmental area. Duplicate reads were discarded for datasets comparison. (E) Median of d3'UTR ratios of Aire-sensitive genes whose expression in the periphery is tissue-restricted and of Aire-neutral genes, relative to the levels of *Clp1* expression (log<sub>10</sub> scale) in 22 mouse tissues. mTEChi are represented by a red and gray cross for the Aire-sensitive (*Top*) and neutral genes (*Bottom*), respectively; peripheral cells are represented by pink and gray circles. Significance is reached for the Aire-sensitive genes,  $P=0.002$ , Pearson correlation.

**Figure 5. Clp1-driven 3'UTR shortening of the Aire-upregulated transcripts show higher stability in mTEChi.**

Relative expression of Aire-sensitive genes in ActD-treated (for indicated time durations) vs. control mTEChi depending on whether they undergo Clp1-mediated 3'UTR shortening as identified in *Clp1* lentigenics. Loess fitted curves are shown in dark orange and black for the Aire-sensitive genes with decreased (<0.5x) and steady d3'UTR ratios, respectively. P values are for comparison of expression ratios.

## Figure 1–figure supplement 1

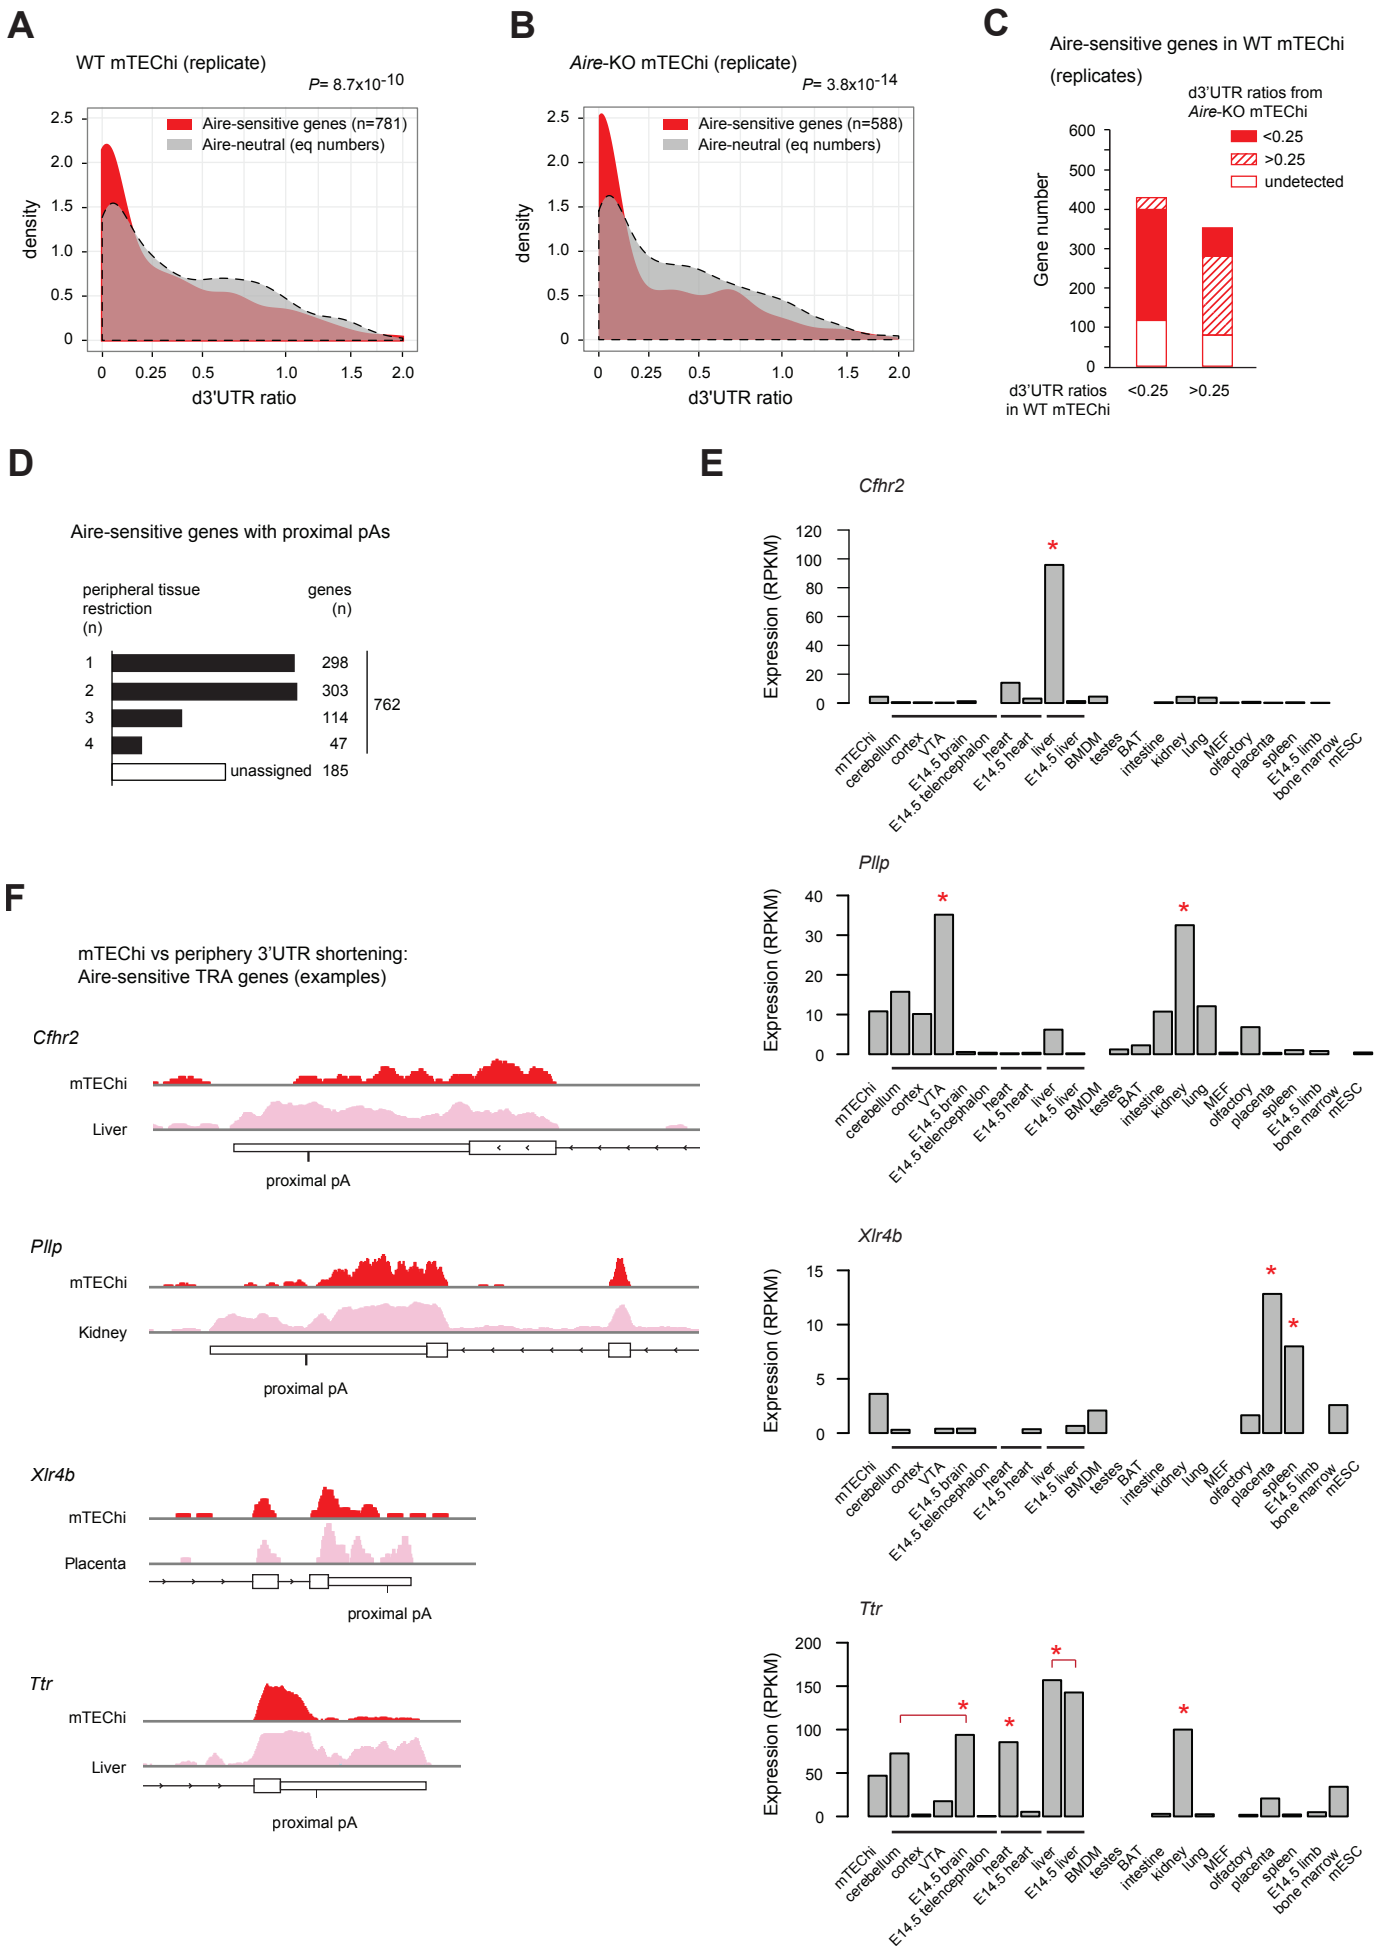

## Figure 2–figure supplement 1

**A**

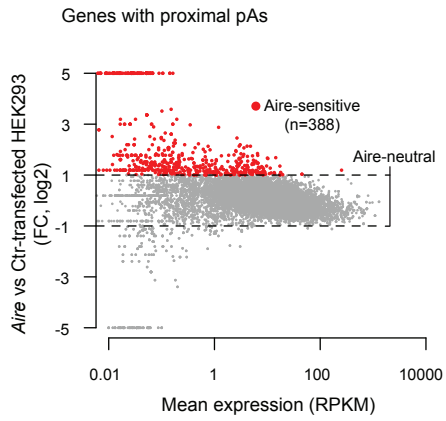

**B**

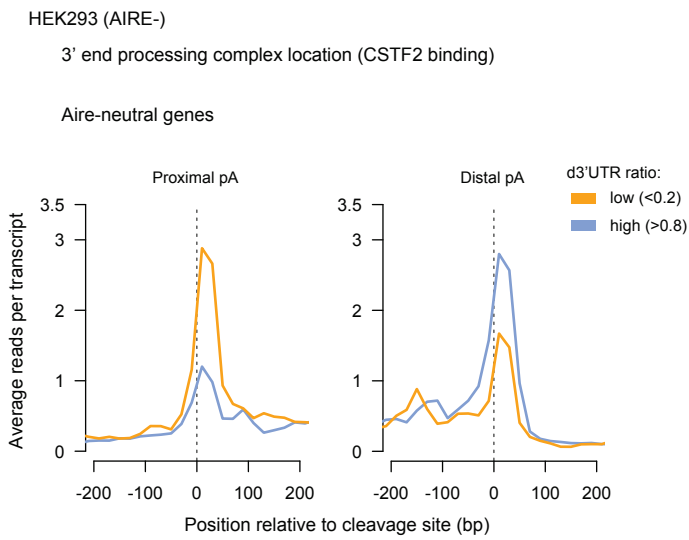

## Figure 3–figure supplement 1

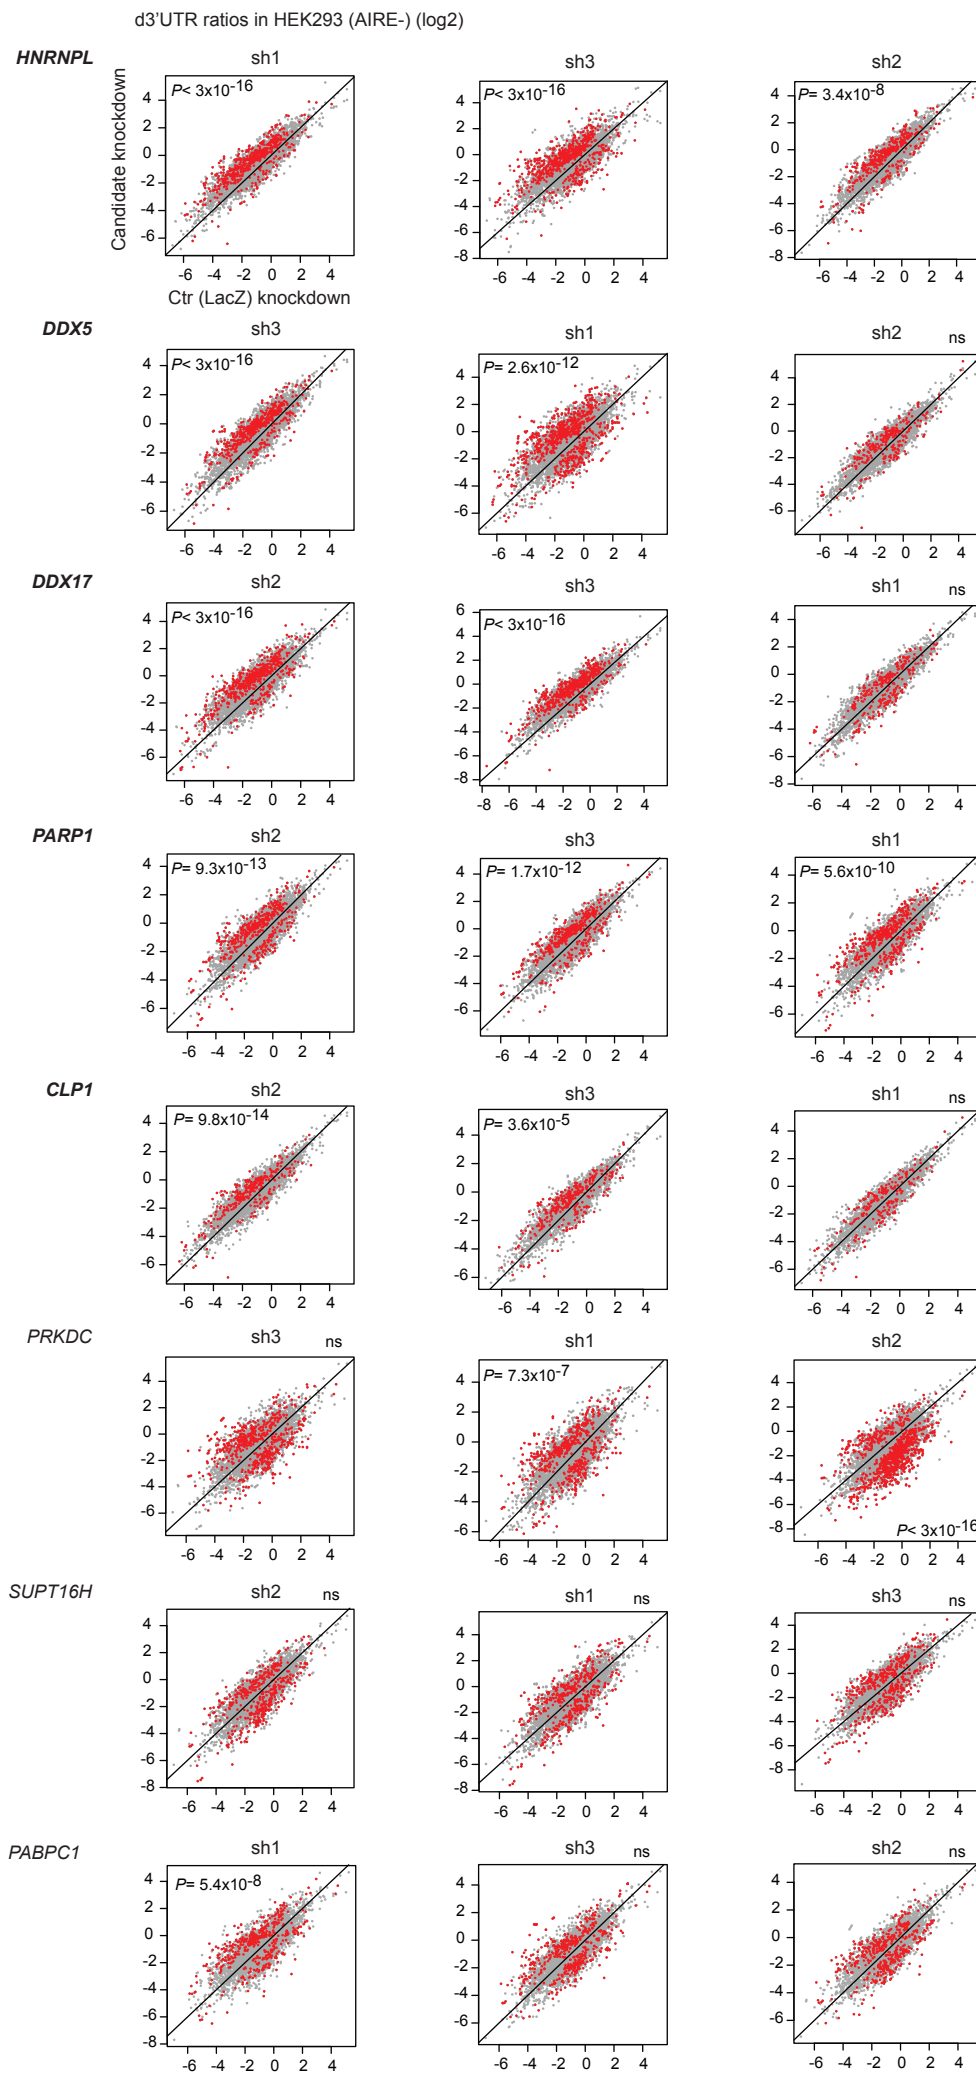

## Figure 3–figure supplement 2

CPSF6 : d3'UTR ratios in HEK293 (AIRE-) (log2)

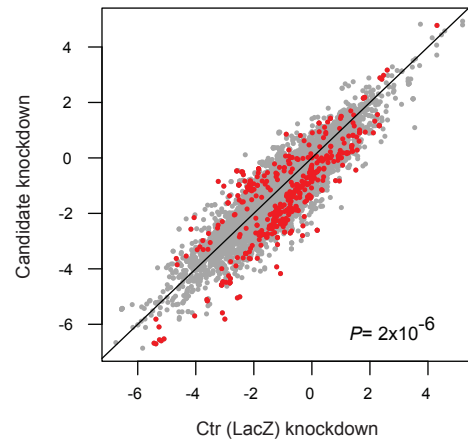

Figure 4–figure supplement 1

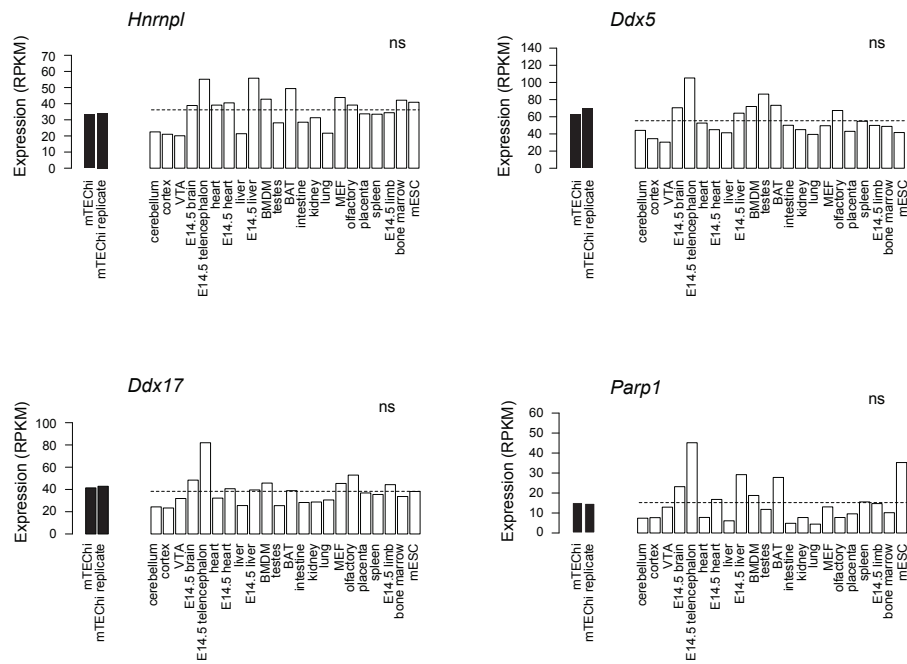

Figure 4–figure supplement 2

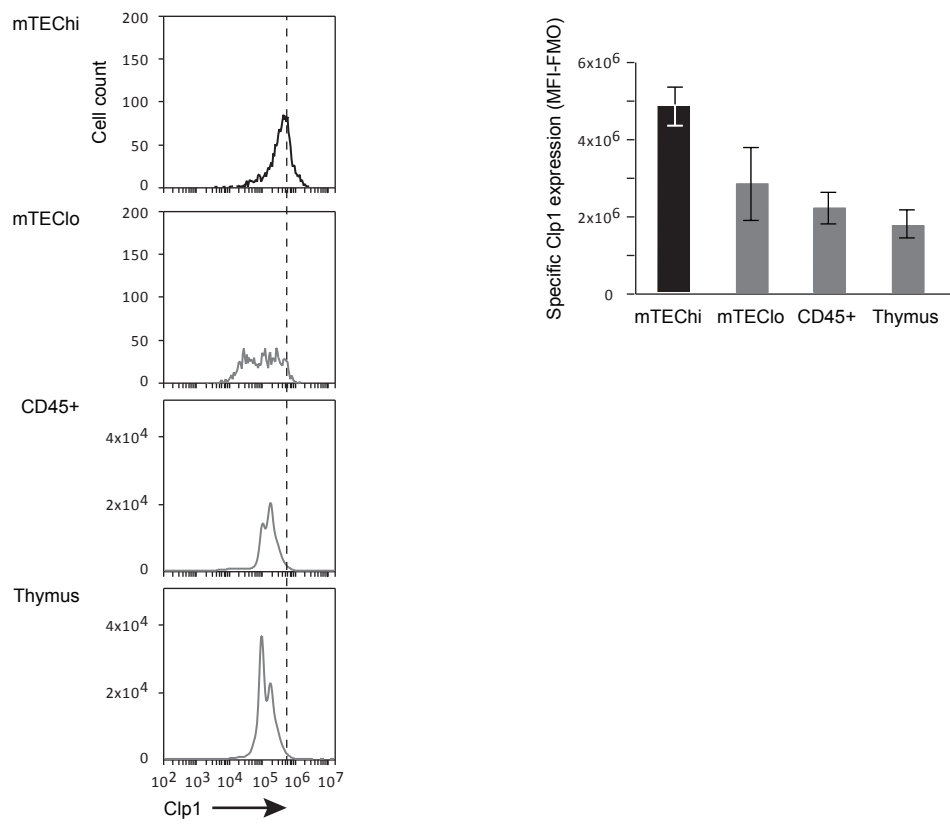



## Figure 4–figure supplement 3

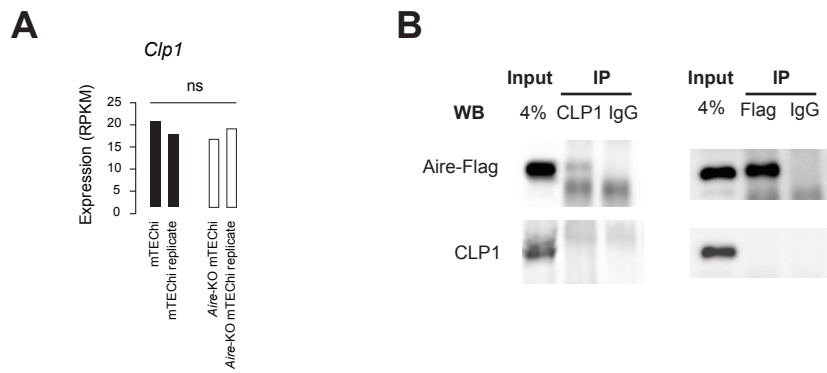

**Figure 1–figure supplement 1. Validation and examples of the preferred short-3'UTR isoform expression of Aire-sensitive genes in mTEChi.**

(A) Densities of d3'UTR ratios of Aire-sensitive genes upregulated by Aire in mTEChi and of Aire-neutral genes from a replicate RNA-seq experiment in WT and *Aire*-KO mTEChi sorted from a pool of 4 thymi; equal number (n=781) of selected neutral genes, asinh scale. (B) Densities of d3'UTR ratios of Aire-sensitive and neutral genes in *Aire*-KO mTEChi; replicate experiment, equal number (n=588) of selected neutral genes, asinh scale. (C) Proportion of Aire-sensitive genes with d3'UTR ratios <0.25 or >0.25 in *Aire*-KO mTEChi among those with d3'UTR ratios <0.25 or >0.25 in WT mTEChi; replicate experiment. (D) Number of Aire-sensitive TRA genes, *i.e.*, specific or selective of two to four tissue types across 16 groups of tissues of similar type from 22 collected mouse-tissue RNA-seq datasets. (E) Level of expression of *Cfhr2*, *Pllp*, *Xlr4b* and *Ttr* (taken as examples of Aire-sensitive TRA genes) from RNA-seq data of mTEChi and 22 mouse tissues. BAT stands for brown adipocytes tissue, BMDM for bone marrow derived macrophage, MEF for mouse embryonic fibroblast, mESC for mouse embryonic stem cells and VTA for ventral tegmental area. Tissues of similar types are binned together (black line). *Cfhr2* is specific to the liver; *Pllp* is selective to the brain and kidney; *Xlr4b* to the placenta and spleen and *Ttr* to the brain, heart, liver and kidney. (F) Examples of Aire-sensitive TRA genes with 3'UTR shortening in mTEChi. Annotated 3'UTRs are represented by thin boxes. For each gene, the mapped RNA-seq reads are shown in mTEChi (red) and in its tissue of normal expression (pink).

**Figure 2—figure supplement 1. Correlation of the binding of the 3' end processing complex with proximal pA location.**

(A) RNA-seq differential expression (fold-change) of genes with proximal pAs between *Aire*-transfected and Ctr-transfected HEK293 cells. Red dots show genes upregulated by twofold or more (Z-score criterion of  $P < 0.01$ ) (*Aire*-sensitive). Genes between the dashed lines have a change in expression less than twofold (*Aire*-neutral). (B) Average density of reads from PAR-CLIP analyses in HEK293 cells (*AIRE*-) of CSTF2 protein as a marker of the 3' end processing complex, in the vicinity of proximal and distal pAs of *Aire*-neutral genes with high d3'UTR ratios  $> 0.8$  or low d3'UTR ratios  $< 0.2$ .

**Figure 3—figure supplement 1. Effect of shRNA-mediated interference of candidate factors on d3'UTR ratios.**

Individual probe-level analysis of microarray data from HEK293 cells infected by lentiviruses containing one of the three hit shRNAs of each candidate gene or the Ctr (LacZ) shRNA. Genes whose d3'UTR ratios vary significantly from a candidate KD sample to the Ctr sample are shown in red, otherwise in gray. P values comparing the proportion of genes with a significant increase or decrease of d3'UTR ratios to the proportion of genes whose variation is not significant, are assessed by a Chi-squared test and labeled in the quadrant toward which the d3'UTR ratios (in red) significantly increase.

**Figure 3—figure supplement 2. CPSF6 promotes 3'UTR lengthening.**

Individual probe-level analysis of microarray data in HEK293 cells infected by a lentivirus targeting *CPSF6*. Genes whose d3'UTR ratios vary significantly from the *CPSF6* KD sample to the Ctr (LacZ) KD sample are shown in red, otherwise in gray.

**Figure 4–figure supplement 1. Comparison of gene expression in mTEChi and in mouse tissues.**

Expression of the candidate factors having an effect on 3'UTR shortening in HEK293 cells from RNA-seq data of two replicate mTEChi samples, and 22 mouse tissues. The dashed lines show the median expression of the factors in the tissues.

**Figure 4–figure supplement 2. Clp1 expression in the thymus.**

Clp1 expression is shown as Mean Fluorescence Intensity (MFI) in mTEChi, mTEClo, thymic-sorted CD45+ and the entire thymus (*Left*) and is subtracted of fluorescence minus one (FMO) control signals from two independent experiments (*Right*).

**Figure 4–figure supplement 3. Clp1 is not linked to nor controlled by Aire.**

(A) Clp1 expression levels are neutral to *Aire* deletion. (B) Coimmunoprecipitation of endogenous CLP1 with Flag-tagged Aire is not specific to CLP1, the latter been not detected in the anti-CLP1 immunoprecipitate. No interaction is detected in the reciprocal immunoprecipitation.
